# Supplementary material for: APP β-CTF triggers cell-autonomous synaptic toxicity independent of Aβ
Source: eLife. 2025 Apr 23;13:RP100968. doi: 10.7554/eLife.100968 (PMC12017768; doi:10.7554/eLife.100968)
Supplement: Figure 1—figure supplement 1—source data 3. [file elife-100968-fig1-figsupp1-data3.xlsx]

## Sheet: s1B
GFP+filler	GFP+APP+BACE1 30:1	GFP+APP+BACE1 30:2	GFP+APP+BACE1 30:4	GFP+APP+BACE1 30:8	APP-IRES-BACE1
0.307413	0.248014	0.283215	0.320743	0.262505	0.159872
0.521077	0.361465	0.28823	0.28678	0.308899	0.296565
0.45869	0.323085	0.35093	0.355458	0.273155	0.21572
0.453678	0.338638	0.21105	0.341647	0.427891	0.270664
0.589329	0.274293	0.245535	0.278794	0.428582	0.40666
0.401772	0.354597		0.457422	0.383285	0.445015
0.453429	0.351615		0.252885		0.537539
0.400236	0.267355		0.26855		0.320594
	0.29283		0.344251		0.39415
	0.340292
	0.231335
	0.276468
					0.39415
