# Supplementary material for: APP β-CTF triggers cell-autonomous synaptic toxicity independent of Aβ
Source: eLife. 2025 Apr 23;13:RP100968. doi: 10.7554/eLife.100968 (PMC12017768; doi:10.7554/eLife.100968)
Supplement: Figure 1—source data 3. [file elife-100968-fig1-data3.xlsx]

## Sheet: 1B
GFP+filler	GFP+APP
0.8279	0.782219
0.576252	0.741267
0.455201	0.911396
0.629676	0.79405
0.641231	0.735637
0.694281	0.473693
0.675229	0.562475
0.639146	0.599
0.707477	0.627732
0.685381	0.562288
0.68659	0.705758
0.403373	0.406902
0.444618	0.29493
0.748633	0.366
0.619298	0.258473
0.593666	0.243096
0.503184
0.415343
0.712687
0.486236
0.583681

## Sheet: 1D
GFP+filler	GFP+APP+BACE1
0.307413	0.283215
0.521077	0.28823
0.45869	0.35093
0.453678	0.21105
0.589329	0.245535
0.401772
0.453429
0.400236

## Sheet: 1F
GFP+filler	GFP+BACE1
0.475827	0.430953
0.332875	0.363326
0.238974	0.446949
0.210287	0.460456
0.320138	0.439228
0.323951	0.345354
0.609377	0.384649
0.536052	0.497608
0.451314	0.34038
0.52892	0.396499
0.408781	0.461996
0.479309	0.434858
0.216024	0.493806
0.482286	0.373137
0.602832	0.468246

## Sheet: 1H
APP	APP + BACE1
2.09158	6.15479
1	5.0009
0.88263	2.43926
0.721895	6.53446

## Sheet: 1J
APP + BACE1	APPMV + BACE1
0.861547	0.027724
0.981828	0.037269
1.09648	0.195104
1.77123	0.111092

## Sheet: 1K
APP + BACE1	APPMV + BACE1
1	0.282966
1.19246	0.3128
1.23356	0.464577
1.31093	0.49353

## Sheet: 1M
GFP + filler	GFP + APP + BACE1	GFP + APPMV + BACE1
0.454968	0.084554	0.361571
0.374851	0.159996	0.334672
0.538954	0.457576	0.525449
0.571398	0.54148	0.509105
0.467954	0.707507	0.483496
0.583575	0.362278	0.452249
0.815488	0.233012	0.252088
0.578612	0.224211	0.792025
0.538403	0.238977	0.608964
0.440862	0.561791	0.907638
0.700108	0.490892
0.594712	0.418342
	0.193346
	0.224389
