# Supplementary material for: APP β-CTF triggers cell-autonomous synaptic toxicity independent of Aβ
Source: eLife. 2025 Apr 23;13:RP100968. doi: 10.7554/eLife.100968 (PMC12017768; doi:10.7554/eLife.100968)
Supplement: Figure 2—figure supplement 1—source data 1. [file elife-100968-fig2-figsupp1-data1.xlsx]

## Sheet: s2B
GFP+filler	GFP+sAPPα	GFP+sAPPβ
0.405888	0.433785	0.545303
0.320583	0.550887	0.411084
0.686593	0.378352	0.262809
0.428953	0.619224	0.54439
0.701747	0.306658	0.418465
0.283012	0.505907	0.521044
0.366656	0.458291	0.336796
0.523948	0.441773	0.385484
0.440037	0.396799	0.521354
0.457473	0.489257	0.524086
	0.513845	0.327061
	0.681539	0.39708
	0.439947	0.185296
		0.651389
		0.3686
		0.548662
		0.306415
		0.47419
		0.275439

## Sheet: s2D
GFP+veh	GFP+PF
0.470112	0.395356
0.414107	0.281826
0.346672	0.325244
0.410846	0.44354
0.431609	0.446285
0.27969	0.433508
0.463986	0.55111
0.375419	0.579058
0.522453	0.502525
0.403417
0.270046
0.459265
0.431573

## Sheet: s2F
GFP+filler	GFP+1/8 β-CTF
0.43163	0.576981
0.586371	0.452986
0.536569	0.388658
0.443096	0.291531
0.454156	0.360231
0.484736	0.296665
0.431976	0.407387
0.343754	0.242238
0.454759	0.386347
0.498636	0.569922
	0.302422

## Sheet: s2H
GFP+filler	GFP+AICD
0.474089	0.284041
0.511333	0.413512
0.536228	0.472136
0.691299	0.44364
0.679148	0.482724
0.628905	0.551377
	0.676752
	0.536518
	0.604391
	0.762868
