# Supplementary material for: APP β-CTF triggers cell-autonomous synaptic toxicity independent of Aβ
Source: eLife. 2025 Apr 23;13:RP100968. doi: 10.7554/eLife.100968 (PMC12017768; doi:10.7554/eLife.100968)
Supplement: Figure 2—source data 3. [file elife-100968-fig2-data3.xlsx]

## Sheet: 2B
GFP	α-CTF	β‘-CTF	β-CTF
0.642182	0.347195	0.46276	0.284791
0.562425	0.419929	0.414258	0.364924
0.4405	0.52221	0.29289	0.2685
0.544786	0.370582	0.320446	0.383419
0.40662	0.416508	0.72871	0.35034
0.409104	0.428649	0.520196	0.412324
0.339237	0.511896	0.394041	0.304756
0.43163		0.273604
0.586371
0.536569
0.443096
0.454156
0.484736
0.590303
0.343754
0.498636
0.431976
0.454759
0.497925

## Sheet: 2E
β-CTF + vehicle	β-CTF + PF
5.49912	0.0160357
7.1187	0.00853457
7.82278	0.00952286
6.91485	0.00907

## Sheet: 2G
GFP + filler	GFP + β-CTF + veh	GFP + β-CTF + PF
0.401577	0.225959	0.390139
0.50106	0.276355	0.555774
0.533476	0.574065	0.366144
0.627375	0.178007	0.173121
0.501786	0.28638	0.332644
0.456123	0.348991	0.416191
0.519763	0.324388	0.306345
0.91249		0.221219
0.37678		0.301997
0.597974		0.329665
0.565964		0.239019
		0.188782
		0.518959
		0.342072

## Sheet: 2I
APP + BACE1 + GFP + veh	APP + BACE1 + GFP + PF
0.59013	0.321993
0.336458	0.45527
0.320793	0.284669
0.609361	0.465587
0.369293	0.207852
0.494674	0.375079
0.36985	0.135486
0.50922	0.378788
0.147644	0.497239
	0.438016
	0.622016
	0.58102
	0.377975
	0.531605

## Sheet: 2K
APP+BACE1+veh	APP+BACE1+PF
1.13785	0.03349
1.28848	0.041981
0.929968	0.040245
0.757894	0.1459

## Sheet: 2L
APP+BACE1	APPΔ59+BACE1
1	24.8452
0.892049	23.6422
0.681151	23.9455
0.595911	24.1071

## Sheet: 2M
APP+BACE1	APPΔ57+BACE1
1.15567	6.38154
0.800999	6.78366
0.596639	5.709
0.704176	6.60885

## Sheet: 2O
GFP + filler	GFP + APPΔ59 + BACE1	GFP + APPΔ57 + BACE1
0.312352	0.739666	0.450283
0.701256	0.543977	0.521046
0.571338	0.408983	0.407772
0.557661	0.540541	0.674411
0.434627	0.688833	0.44616
0.377933	0.628619	0.405317
0.612532	0.536377
0.371723
0.588776
