# Supplementary material for: APP β-CTF triggers cell-autonomous synaptic toxicity independent of Aβ
Source: eLife. 2025 Apr 23;13:RP100968. doi: 10.7554/eLife.100968 (PMC12017768; doi:10.7554/eLife.100968)
Supplement: Figure 3—source data 1. [file elife-100968-fig3-data1.xlsx]

## Sheet: 3C
GFP only	GFP+β-CTF
1.36128	1.27673
1.28997	0.914499
1.11755	0.985029
1.40364	1.17878
1.17599	0.825291
1.13462	0.901482
0.924625	0.946594
1.43693	1.1644
1.14125	1.06095
1.0056	0.840878
	1.01301
	0.885595
	1.03327

## Sheet: 3E 
	untrans										trans
GFP only	0.56	0.73	0.615	0.625	0.55	0.7	0.52	0.39	0.4384	0.5365	0.62	0.61	0.73	0.7	0.56	0.53	0.51	0.57	0.4	0.56
GFP + β-CTF	0.54	0.64	0.41	0.55	0.56	0.5	0.41	0.477	0.433	0.75	0.1757	0.1305	0.087	0.13457	0.237	0.248	0.232	0.115	0.13457	0.237

## Sheet: 3F
	untrans										trans
GFP only	8.8	13.15	7.9	10.1	7.4	7.03	7.7	8.2	7.2	6.9	10.3	8.2	8.1	8.9	11.02	11.2	8.1	10.5	6.23	7.7
GFP + β-CTF	13.3	8.8	13.5	11.6	6.9	14.75	8.7	6.81	12.9	8.6	11.7	12.3	14.75	13.1	7.39	13.43	8.58	7.18	13.14	7.39
