# Supplementary material for: APP β-CTF triggers cell-autonomous synaptic toxicity independent of Aβ
Source: eLife. 2025 Apr 23;13:RP100968. doi: 10.7554/eLife.100968 (PMC12017768; doi:10.7554/eLife.100968)
Supplement: Figure 4—figure supplement 1—source data 1. [file elife-100968-fig4-figsupp1-data1.xlsx]

## Sheet: s3B
GFP	β-CTF
5.64315	8.41211
4.16795	7.7616
5.09184	8.3533
5.13755	4.18624
5.05756	4.13995
4.18769	6.78098
6.31832	6.23647
5.43416	7.63473
4.72751	10.1915
5.67612	6.27299
5.09715	6.21982
5.31611	6.14365
5.7494	6.3111
5.3341	4.1755
	5.37079

## Sheet: s3C
	GFP														β-CTF
10 min	5903.22	4332.62	4331.72	4683.65	3996.46	4763.65	5661.44	5737.78	5162.46	5632.55	4334.01	4045.38	5517.81	3988.55	7542.23	7797.95	7070.48	4529.51	3353.22	6454.66	5599.6	7476.07	8744.51	6634.95	4170.69	7029.13	6078.97	4311.14	6079.65
20 min	3907.67	3043.29	3519.81	3538.57	3147.38	3309.03	4006.31	4131.12	3765.06	4135.95	4041.63	3439.05	3452.7	2976.69	4940.53	5204.91	5073.86	2917.48	2845.23	6249.16	4528.43	5749.91	7156.38	4523.8	3754.01	4289.48	4441.21	3040.74	2828.07
30 min	2573.69	2324.72	3100.14	3073.28	2942.68	3036.91	4368.66	3371.53	1573.99	3488.21	3008.84	2797.42	3484.25	3629.89	4741.06	4461.71	4547.13	2024.05	2363.37	4672.12	3768.78	4765.61	6478.65	4166.68	3585.09	3413.2	3112.35	2302.13	2823.79
40 min	3069.03	2293.1	2379.89	3145.84	3053.74	1424.37	3569.14	2196.23	2582.05	2832.38	2053.13	2845.3	3131.89	2440.73	4616.2	3845.3	4091.05	2533.5	2305.29	2259.15	3354.81	3321.68	5183.79	2819.88	3517.9	2268.93	3549.41	2190.26	2471.93
50 min	2405.33	1707.86	2226.61	2267.24	2412.71	1653.34	2533.03	2014.42	1995.79	2304.53	2575.97	3171.07	2392.14	2721.65	4717.03	3147.09	5046.81	1831.05	2089.3	2827.51	2506.09	3439.04	4257.23	2621.73	3571.17	2463.25	2834.74	1216.33	2414.08
60 min	2454.22	1302.28	2769.4	1780.63	2651.13	886.725	2605.81	2103.97	1619.29	2031.46	2334.87	2830.43	2715.72	3441.61	3725.11	3484.02	4241.11	1233.77	1618.98	1940.46	2691.99	2732.03	4851.26	1710.69	3789.93	2638.38	2699.72	1922.04	2716.88

## Sheet: s3D
GFP	β-CTF
417.04	827.48
180.72	738.84
406.4	352.16
553.24	486.16
566.76	367.72
132.96	430.16
427.84	691.4
289.32	325.56
794	1051.48
388.16	445.76
314.84	736.8
481.4	635.2
441.84	676.2
275.68	391.88
	376.16

## Sheet: s3E
	GFP														β-CTF
10 min	46	50	43	48	15	36	37	63	79	48	33	38	68	38	73	80	63	51	32	48	68	33	101	62	46	65	68	47	51
20 min	53	30	40	37	33	33	60	56	46	69	29	46	54	28	70	57	71	41	21	57	64	44	137	42	57	60	58	45	30
30 min	36	22	46	35	37	23	52	42	22	47	23	41	52	42	73	53	47	17	16	47	52	37	110	54	59	45	59	23	35
40 min	48	14	30	46	53	3	41	20	31	23	17	26	42	15	64	45	38	29	19	22	53	24	77	30	47	29	42	22	24
50 min	35	7	31	27	43	5	27	13	37	21	12	40	29	20	73	50	53	33	30	36	34	35	68	24	52	31	39	10	23
60 min	19	4	35	16	38	1	26	14	30	19	11	27	31	28	56	48	54	15	19	16	31	31	74	23	58	33	41	16	24

## Sheet: s3F
GFP	β-CTF
444	354
316	435
456	485
444	426
591	385
284	463
525	551
392	468
300	356
360	341
494	575
488	422
436	501
501	425
	584

## Sheet: s3G
	GFP														β-CTF
10 min	72	72	68	85	91	66	85	86	56	69	87	78	57	82	54	58	62	87	72	66	101	82	55	58	83	61	72	73	83
20 min	89	69	82	76	94	75	87	84	68	76	87	82	76	101	64	78	86	78	71	73	96	64	42	64	106	75	84	88	107
30 min	55	55	86	86	99	67	84	76	37	66	93	91	77	91	63	88	88	63	63	79	93	84	55	71	106	78	94	87	99
40 min	84	49	59	86	114	33	94	65	66	56	71	86	77	68	54	75	84	89	70	86	91	82	58	62	92	57	77	71	91
50 min	81	30	78	61	99	34	81	42	46	49	86	82	67	73	70	68	87	67	61	82	82	83	76	49	86	71	90	41	99
60 min	64	41	83	52	94	10	95	40	28	44	70	69	83	86	50	68	78	42	49	79	88	74	71	38	102	81	86	66	107

## Sheet: s3I
	GFP						β-CTF
open arm	179.89	329.25	374.89	127.63	111.76	132.78	565.9	371.64	231.65	326.02	375.46	220.09	428.49
close arm	892.83	911.33	1211.88	898.47	1141.46	1309.93	1436.09	817.5	1104.92	1062.82	1075.78	1303.94	1124.06
center	249.12	377.58	290.11	167.11	326.56	405.47	436.23	376.61	525.86	374.79	271.48	307.4	452.19
total	1327.48	1622.08	1883.33	1197.93	1586.32	1853.62	2441.42	1568.08	1868.81	1769.83	1724.02	1839.95	2010.97

## Sheet: s3J
	GFP						β-CTF
open arm	51.88	79.2	67.12	34.8	23.72	39.2	97.92	87.32	59.52	73.52	100.76	57.24	90.12
close arm	189.8	127.4	175.28	225.92	202.48	171.68	132.84	120	132.48	138.84	149.68	188.32	113.4
center	57.56	93	56.88	38.52	72.16	88.52	68.96	92.32	107.44	86.72	49.44	53.12	95.88

## Sheet: s3K
GFP	β-CTF
130	140
103	129
124	121
89	79
155	95
127	129
104	135
162	117
40	65
106	149
64	77
90	98
76	132
96	104
	83
