# Supplementary material for: APP β-CTF triggers cell-autonomous synaptic toxicity independent of Aβ
Source: eLife. 2025 Apr 23;13:RP100968. doi: 10.7554/eLife.100968 (PMC12017768; doi:10.7554/eLife.100968)
Supplement: Figure 4—source data 1. [file elife-100968-fig4-data1.xlsx]

## Sheet: 4E
GFP	β-CTF
34.6	33.2
32.3	31
34	29.4
38.5	31.2
42.8	30.7
35.6	31.6
35.8	34
34.4	31.4
32	33
30.6	31.4
36.7	31.9
38.5	30
36.2	32.9
38.5	30
	32.6

## Sheet: 4F
GFP	β-CTF
0.692308	0.4
0.666667	0.692308
0.382979	0.622642
0.5	0.428571
0.76087	0.465116
0.473684	0.488372
0.461538	0.513514
0.625	0.5
0.547619	0.470588
0.409091	0.571429
0.727273	0.489362
0.72	0.473684
0.75	0.464286
0.68	0.424242
	0.465517

## Sheet: 4H
	GFP													β-CTF
Baseline	18.4444	19.8222	6.4	1.4	30.0222	7.08889	10.5778	1.88889	26.7333	8.73333	33.4	2.93333	13.9778	0	0	0	1.22222	5.48889	10.5111	26.7111	1.73333	1.84444	21.9556	7.08889	7.06667	2.62222	15.4222	13.6444
Contextual Test	58.9867	51.1733	72.3067	44.1867	79.6933	54.9867	59.0533	56.4667	69.844	35.6752	34.2621	41.6878	62.365	39.32	19.2267	60.3467	47.2	39.4533	65.44	52.3733	43.8133	21.8904	30.1027	32.7423	17.451	38.3016	32.9556	44.0075
Cued Test	92.5778	83.1333	96.7111	94.4	99.9333	99.1778	98.4222	71.7333	88.6889	91.3333	91.7556	96.6444	97.7111	89.8	90.4	97.6222	78.2	92.1556	98.1111	99.2667	56.5778	69.2667	93.7333	97.9556	84.8	84.0222	34.9778	99

## Sheet: 4J
	GFP														β-CTF
day1	0	0.4	0	0	0.4	0.4	0.4	0	0	0	0.4	0.4	0.2	0.2	0.8	0	0.2	0	0.6	0.4	0	0	1	0	0	0	0	0.4	0.6
day2	0	1	0.6	0.2	1	1	0.8	0.2	0.8	0	0.6	0.8	1	0.8	0.8	0	1	0	0.6	0.8	0.8	0.8	0	0.8	0	0.2	0	1	0.8
day3	0.8	1	1	0.8	1	1	1	0.2	0.8	0.8	1	1	1	1	0.8	0	1	0	0.6	0.8	1	0.4	0	1	0	1	0	1	1
day4	1	0.8	1	0.8	1	1	0.8	0.2	1	1	1	1	1	1	1	0	1	0.8	1	1	1	0.6	0	1	0.4	0.8	0	1	1
day5	1	1	1	1	0.6	1	1	0.8	1	1	1	1	1	1	1	0	1	0.8	1	1	1	1	0	1	0.8	1	0.2	1	1
day6	1	1	1	1	1	1	1	1	1	1	1	1	1	1	1	1	1	0.6	1	1	1	1	0.8	1	0.8	1	1	1	1
day7	1	1	1	1	1	1	1	1	1	1	1	1	1	1	1	1	1	1	1	1	1	1	1	1	1	1	1	1	1

## Sheet: 4K
	GFP														β-CTF
day1	0	0	0.4	0.2	0.4	0.2	0	0	0	0.2	0	0.2	0.4	0	0	0	0	0.6	0	0	0	0.4	0	0.2	0	0	0	0	0.4
day2	0.4	0.6	1	0.4	0.4	0	0.6	0	0.4	0.8	0	0.6	1	0.8	0	0	0.4	0.8	0	0.6	0.6	1	0	0.4	0.2	0	0	0.4	1
day3	0.8	1	1	1	1	0	1	0.2	1	1	0.4	1	1	1	0	0.6	0.8	1	0.8	1	1	0.8	0.2	1	0	0.4	0	1	1
day4	1	1	1	1	1	0.4	1	0.2	1	1	0.8	1	1	1	0.8	0.6	1	1	0.8	1	1	1	0.6	1	0.4	1	0.8	1	1
day5	1	1	1	1	1	0.8	1	0.6	1	1	1	1	1	1	1	1	1	1	1	1	1	1	0.8	1	1	1	1	1	1
