# Supplementary material for: APP β-CTF triggers cell-autonomous synaptic toxicity independent of Aβ
Source: eLife. 2025 Apr 23;13:RP100968. doi: 10.7554/eLife.100968 (PMC12017768; doi:10.7554/eLife.100968)
Supplement: Figure 5—figure supplement 1—source data 1. [file elife-100968-fig5-figsupp1-data1.xlsx]

## Sheet: s4D
filler	α-CTF	β-CTF
0.37419	0.413182	0.401619
0.3535	0.379455	0.43725
0.4152	0.422455	0.43725
0.325789	0.429636	0.4335
0.458762	0.409238	0.37345
0.46785	0.3632	0.271857
	0.423048	0.39705
