# Supplementary material for: APP β-CTF triggers cell-autonomous synaptic toxicity independent of Aβ
Source: eLife. 2025 Apr 23;13:RP100968. doi: 10.7554/eLife.100968 (PMC12017768; doi:10.7554/eLife.100968)
Supplement: Figure 5—source data 3. [file elife-100968-fig5-data3.xlsx]

## Sheet: 5D
GFP	α-CTF	β-CTF
0.17319	0.23181	0.495405
0.237325	0.205	0.335021
0.2425	0.157738	0.457205
0.232786	0.234714	0.305705
0.404024	0.26055	0.375143
0.222119	0.453109	0.32825
0.4575	0.340476	0.74435
0.276048	0.202952	0.522262
0.396262	0.208714	0.268357
		0.488229
		0.671182

## Sheet: 5G
β-CTF	β-CTFmut
0.939455	0.74246
0.889465	0.876044
0.765634	1.00638
0.926369	0.639009

## Sheet: 5H
β-CTF	β-CTFmut
0.685731	0.598817
0.670637	0.608107
0.818979	1.44929
0.668773	0.543416
1.23981	1.14862

## Sheet: 5J
β-CTF	β-CTFmut
0.495405	0.376725
0.335021	0.24035
0.457205	0.1635
0.305705	0.1895
0.375143	0.214075
0.32825	0.194875
0.74435	0.281775
0.522262	0.22925
0.268357	0.33035
0.488229
0.671182

## Sheet: 5L
β-CTF	β-CTFmut
0.318698	0.548831
0.317561	0.623327
0.515645	0.479437
0.399575	0.447433
0.212888	0.523466
0.321629	0.707976
0.469024	0.450792
0.46322	0.589019
0.257385	0.362917
0.27481	0.564047
0.351967	0.470744
0.467763	0.44254
	0.479273
	0.628682
	0.428196
