# Supplementary material for: APP β-CTF triggers cell-autonomous synaptic toxicity independent of Aβ
Source: eLife. 2025 Apr 23;13:RP100968. doi: 10.7554/eLife.100968 (PMC12017768; doi:10.7554/eLife.100968)
Supplement: Figure 6—figure supplement 1—source data 3. [file elife-100968-fig6-figsupp1-data3.xlsx]

## Sheet: s5B
	β-CTF + veh								β-CTF + GSI
Synapsin-1	0.726472	1.13622	1.34149	1.43107	0.737839	1.64242			0.23953	0.450767	0.620616	0.403997	0.441416	0.90653
GluR1	3.64669	5.0149	0.905385	1.3189	0.575623	0.261947	0.299311	0.216404	1.38209	2.3308	0.0555162	0.660015	0.130513	0.275261	0.0519167	0.107643

## Sheet: s5C
_MEMBER_MyList	_LogP_MyList	GO	_PATTERN_	_RANK_	GiniIndex	Category	CategoryID	Description	PARENT_GO	LogP	Enrichment	Z-score	#TotalGeneInLibrary	#GeneInGO	#GeneInHitList	#GeneInGOAndHitList	%InGO	STDV %InGO	GeneID	Hits	Log(q-value)	EvidenceCutoff	GROUP_ID	FirstInGroupByEnrichment	FirstInGroupByLogP	BestLogPInGroup	BestEnrichmentInGroup
1	-2.49352	R-RNO-71406	M1	1	0	Reactome Gene Sets	6	Pyruvate metabolism and Citric Acid (TCA) cycle	2.49352	-2.49352	10.1252	4.99132	18033	39	137	3	2.18978	1.25035	81829|294320|363061	Mdh2|Glo1|Sdhd	-0.824769	0	10	1	1	-2.49352	10.1252
1	-2.89477	R-RNO-72172	M1	1	0	Reactome Gene Sets	6	mRNA Splicing	2.89477	-2.89477	5.03036	4.43775	18033	157	137	6	4.37956	1.74836	79256|117259|300996|302855|313035|361808	Hnrnpd|Tra2b|Rbm5|Rbmx|Dnajc8|Snrpc	-1.14684	0	8	0	0	-3.01193	5.30045
1	-3.93541	R-RNO-140342	M1	1	0	Reactome Gene Sets	6	Apoptosis induced DNA fragmentation	3.93541	-3.93541	30.3756	9.27013	18033	13	137	3	2.18978	1.25035	24437|29395|201097	H1f0|Hmgb2|H1f4	-2.03258	0	4	1	1	-3.93541	30.3756
1	-4.88947	R-RNO-8978868	M1	1	0	Reactome Gene Sets	6	Fatty acid metabolism	4.88947	-4.88947	7.41565	6.7154	18033	142	137	8	5.83942	2.00336	24404|25413|25541|25757|117243|171155|361802|687008	Gpx1|Cpt2|Scp2|Cpt1a|Acsl6|Hadhb|Hsd17b8|Pcca	-2.86853	0	2	1	1	-4.88947	7.41565
1	-5.13371	R-RNO-8953854	M1	1	0	Reactome Gene Sets	6	Metabolism of RNA	5.13371	-5.13371	3.89431	5.78378	18033	507	137	15	10.9489	2.66775	26962|29304|79256|81774|94266|117259|291434|294282|300996|302855|307947|313035|361808|685963|691531	Rpl8|Rps6|Hnrnpd|Rps11|Rps27|Tra2b|Rpl17|Rps18|Rbm5|Rbmx|Setsip|Dnajc8|Snrpc|Rpl38-ps9|Rps28	-2.98784	0	1	0	0	-9.89354	13.8556
1	-6.24067	R-RNO-72737	M1	1	0	Reactome Gene Sets	6	Cap-dependent Translation Initiation	6.24067	-6.24067	9.25508	8.20055	18033	128	137	9	6.56934	2.11663	26962|29304|81774|94266|291434|294282|685963|691531|691947	Rpl8|Rps6|Rps11|Rps27|Rpl17|Rps18|Rpl38-ps9|Rps28|Eif3j	-3.86071	0	1	0	0	-9.89354	13.8556
1	-6.41794	R-RNO-72706	M1	1	0	Reactome Gene Sets	6	GTP hydrolysis and joining of the 60S ribosomal subunit	6.41794	-6.41794	9.71024	8.44607	18033	122	137	9	6.56934	2.11663	26962|29304|81774|94266|291434|294282|685963|691531|691947	Rpl8|Rps6|Rps11|Rps27|Rpl17|Rps18|Rpl38-ps9|Rps28|Eif3j	-3.89186	0	1	0	0	-9.89354	13.8556
1	-9.89354	R-RNO-72766	M1	1	0	Reactome Gene Sets	6	Translation	9.89354	-9.89354	8.97462	10.4125	18033	220	137	15	10.9489	2.66775	26962|29304|56281|81774|94266|116650|171061|290850|291434|293754|294282|296551|685963|691531|691947	Rpl8|Rps6|Mrpl37|Rps11|Rps27|Srp54a|Mrpl17|Mrps31|Rpl17|Mrpl16|Rps18|Mrpl41|Rpl38-ps9|Rps28|Eif3j	-6.66848	0	1	1	1	-9.89354	13.8556

## Sheet: s5D
_MEMBER_MyList	_LogP_MyList	GO	_PATTERN_	_RANK_	GiniIndex	Category	CategoryID	Description	PARENT_GO	LogP	Enrichment	Z-score	#TotalGeneInLibrary	#GeneInGO	#GeneInHitList	#GeneInGOAndHitList	%InGO	STDV %InGO	GeneID	Hits	Log(q-value)	EvidenceCutoff	GROUP_ID	FirstInGroupByEnrichment	FirstInGroupByLogP	BestLogPInGroup	BestEnrichmentInGroup
1	-4.58152	GO:0099175	M1	1	0	GO Biological Processes	19	regulation of postsynapse organization	19_GO:0050789 regulation of biological process	-4.58152	8.0824	6.63713	18033	114	137	7	5.10949	1.88122	25150|26954|54226|84009|171297|299617|360406	Fyn|Rheb|App|Kalrn|Nlgn3|Abhd17a|Ptprf	-1.28869	0	4	1	1	-4.58152	13.6167
1	-4.70248	GO:0071826	M1	1	0	GO Biological Processes	19	ribonucleoprotein complex subunit organization	19_GO:0009987 cellular process	-4.70248	6.01345	6.19049	18033	197	137	9	6.56934	2.11663	29304|94266|290864|300996|302855|310820|361808|691531|691947	Rps6|Rps27|Usp4|Rbm5|Rbmx|Ptbp2|Snrpc|Rps28|Eif3j	-1.35165	0	3	0	0	-4.84579	15.1878
1	-5.10218	GO:0006886	M1	1	0	GO Biological Processes	19	intracellular protein transport	19_GO:0051179 localization	-5.10218	3.47465	5.59529	18033	644	137	17	12.4088	2.81666	60382|64088|64152|65277|79563|81002|81754|83823|114766|116650|117030|117265|288584|293456|296199|300652|680423	Arfip1|Snx16|Chp1|Vti1a|Grpel1|Trim23|Rab1a|Gipc1|Phb2|Srp54a|Erp29|Pex6|Fis1|Cog7|Snx5|Sorl1|Aup1	-1.60522	0	2	1	1	-5.10218	7.17969
1	-5.6109	GO:0006412	M1	1	0	GO Biological Processes	19	translation	19_GO:0008152 metabolic process	-5.6109	4.2644	6.22604	18033	463	137	15	10.9489	2.66775	26962|29304|56281|81774|94266|114488|171061|287924|291434|293754|294282|296551|361309|691531|691947	Rpl8|Rps6|Mrpl37|Rps11|Rps27|Rbm3|Mrpl17|Yars2|Rpl17|Mrpl16|Rps18|Mrpl41|Paip2|Rps28|Eif3j	-2.01704	0	1	0	0	-8.78621	6.34351
1	-8.78621	GO:0006518	M1	1	0	GO Biological Processes	19	peptide metabolic process	19_GO:0008152 metabolic process	-8.78621	4.67066	8.13781	18033	620	137	22	16.0584	3.13675	24404|24787|25306|25458|25669|26962|29304|56281|66028|81774|94266|114488|171061|287924|291434|293754|294282|294320|296551|361309|691531|691947	Gpx1|Sod2|Cpd|Gss|Cpe|Rpl8|Rps6|Mrpl37|Arl6ip5|Rps11|Rps27|Rbm3|Mrpl17|Yars2|Rpl17|Mrpl16|Rps18|Glo1|Mrpl41|Paip2|Rps28|Eif3j	-4.59028	0	1	1	1	-8.78621	6.34351
_MEMBER_MyList	_LogP_MyList	GO	_PATTERN_	_RANK_	GiniIndex	Category	CategoryID	Description	PARENT_GO	LogP	Enrichment	Z-score	#TotalGeneInLibrary	#GeneInGO	#GeneInHitList	#GeneInGOAndHitList	%InGO	STDV %InGO	GeneID	Hits	Log(q-value)	EvidenceCutoff	GROUP_ID	FirstInGroupByEnrichment	FirstInGroupByLogP	BestLogPInGroup	BestEnrichmentInGroup
1	-2.27469	GO:0005777	M1	1	0	GO Cellular Components	20	peroxisome	2.27469	-2.27469	4.47713	3.70363	18033	147	137	5	3.64964	1.60211	25541|113898|117243|117265|288584	Scp2|Prdx5|Acsl6|Pex6|Fis1	-0.647188	0	9	0	0	-3.21393	7.31265
1	-4.76342	GO:0098793	M1	1	0	GO Cellular Components	20	presynapse	4.76342	-4.76342	3.27145	5.29905	18033	684	137	17	12.4088	2.81666	25023|25639|54226|65277|81520|81754|83823|84009|94266|114766|117556|140447|155812|171093|171297|266606|287876	Prkcb|Fkbp1a|App|Vti1a|Marcksl1|Rab1a|Gipc1|Kalrn|Rps27|Phb2|Sv2b|Slc8a2|Trim9|Shank2|Nlgn3|Tor1a|Actg1	-2.37626	0	2	0	0	-6.74313	4.88641
1	-4.90635	GO:0099572	M1	1	0	GO Cellular Components	20	postsynaptic specialization	4.90635	-4.90635	3.96299	5.66369	18033	465	137	14	10.219	2.58783	25150|26954|26962|65195|84009|94266|114766|140447|171093|171297|294282|299617|360406|363235	Fyn|Rheb|Rpl8|Kcnd3|Kalrn|Rps27|Phb2|Slc8a2|Shank2|Nlgn3|Rps18|Abhd17a|Ptprf|Als2	-2.46119	0	5	1	1	-4.90635	3.98872
1	-5.98093	GO:0005759	M1	1	0	GO Cellular Components	20	mitochondrial matrix	5.98093	-5.98093	5.33072	6.84988	18033	321	137	13	9.48905	2.50381	24787|56281|79563|81829|171061|171155|287924|290850|293754|296551|300689|361802|687008	Sod2|Mrpl37|Grpel1|Mdh2|Mrpl17|Hadhb|Yars2|Mrps31|Mrpl16|Mrpl41|Rexo2|Hsd17b8|Pcca	-3.16779	0	3	1	1	-5.98093	9.07777
1	-6.78284	GO:0044391	M1	1	0	GO Cellular Components	20	ribosomal subunit	6.78284	-6.78284	6.95829	7.90416	18033	227	137	12	8.75912	2.41526	26962|29304|56281|81774|94266|171061|290850|291434|293754|294282|296551|691531	Rpl8|Rps6|Mrpl37|Rps11|Rps27|Mrpl17|Mrps31|Rpl17|Mrpl16|Rps18|Mrpl41|Rps28	-3.7539	0	1	1	1	-6.78284	10.6151
_MEMBER_MyList	_LogP_MyList	GO	_PATTERN_	_RANK_	GiniIndex	Category	CategoryID	Description	PARENT_GO	LogP	Enrichment	Z-score	#TotalGeneInLibrary	#GeneInGO	#GeneInHitList	#GeneInGOAndHitList	%InGO	STDV %InGO	GeneID	Hits	Log(q-value)	EvidenceCutoff	GROUP_ID	FirstInGroupByEnrichment	FirstInGroupByLogP	BestLogPInGroup	BestEnrichmentInGroup
1	-2.018	GO:0051087	M1	1	0	GO Molecular Functions	21	chaperone binding	2.018	-2.018	4.83038	3.50947	18033	109	137	4	2.91971	1.43838	54226|79563|81829|117030	App|Grpel1|Mdh2|Erp29	0	0	2	0	0	-3.4625	4.83038
1	-2.1436	GO:0016747	M1	1	0	GO Molecular Functions	21	acyltransferase activity, transferring groups other than amino-acyl groups	2.1436	-2.1436	3.54155	3.34137	18033	223	137	6	4.37956	1.74836	25413|25541|25757|171155|303518|366697	Cpt2|Scp2|Cpt1a|Hadhb|Smarce1|Sptlc2	0	0	3	0	0	-3.28726	18.804
1	-3.34786	GO:0019843	M1	1	0	GO Molecular Functions	21	rRNA binding	3.34786	-3.34786	7.83498	5.49365	18033	84	137	5	3.64964	1.60211	26962|81774|291434|293754|294282	Rpl8|Rps11|Rpl17|Mrpl16|Rps18	-0.303542	0	1	0	0	-6.78284	7.83498
1	-4.96336	GO:0005198	M1	1	0	GO Molecular Functions	21	structural molecule activity	4.96336	-4.96336	3.39041	5.47408	18033	660	137	17	12.4088	2.81666	24437|26962|29304|56281|81774|94266|171061|171093|201097|287876|290850|291434|293754|294282|296551|690795|691531	H1f0|Rpl8|Rps6|Mrpl37|Rps11|Rps27|Mrpl17|Shank2|H1f4|Actg1|Mrps31|Rpl17|Mrpl16|Rps18|Mrpl41|H2aj|Rps28	-1.5817	0	1	0	0	-6.78284	7.83498
1	-6.78284	GO:0003735	M1	1	0	GO Molecular Functions	21	structural constituent of ribosome	6.78284	-6.78284	6.95829	7.90416	18033	227	137	12	8.75912	2.41526	26962|29304|56281|81774|94266|171061|290850|291434|293754|294282|296551|691531	Rpl8|Rps6|Mrpl37|Rps11|Rps27|Mrpl17|Mrps31|Rpl17|Mrpl16|Rps18|Mrpl41|Rps28	-3.10015	0	1	1	1	-6.78284	7.83498

## Sheet: s5F
Rab5WT	Rab5Q79L
0.17319	0.5275
0.237325	0.669
0.2425	0.905556
0.232786	0.6355
0.404024	0.7005
0.222119
0.4575
0.276048
0.396262

## Sheet: s5H
	β-CTF								β-CTF + Rab5S34N
GluR1	1.44973	2.50605	0.307563	5.29948	0.50859	1.22004	1.49391	1.79063	1.02583	1.2996	0.574358	3.44719	1.12386	0.731716	1.17409	1.95383
VAMP2	3.16992	4.17565	0.935517	2.17724	1.11273	1.49946	1.95924	1.1703	1.13986	1.66529	1.10649	2.47499	1.01305	1.78407	1.18918	1.4774
Synapsin-1	3.12671	5.42709	1.32602	1.67757	1.07444	0.901981	1.48811	1.07738	1.53725	1.97083	1.31356	1.63114	0.781866	1.21977	1.66751	1.27145
