# Supplementary material for: APP β-CTF triggers cell-autonomous synaptic toxicity independent of Aβ
Source: eLife. 2025 Apr 23;13:RP100968. doi: 10.7554/eLife.100968 (PMC12017768; doi:10.7554/eLife.100968)
Supplement: Figure 6—source data 3. [file elife-100968-fig6-data3.xlsx]

## Sheet: 6B
Gene	log2 fold change	log 10 p-value
HOME3	0.249638	0.410579
LIN7A	0.0693768	0.246753
ILKAP	0.456644	0.74068
PK3CB	-0.00459061	0.00541991
AGRF5	0.263533	0.389237
SHIP2	-1.14822	0.699014
SC11C	3.16e-05	3.97e-05
DNJC3	-0.287568	0.676963
ABCB9	0.692851	1.25142
SHAN3	0.651411	0.337246
TIM22	-0.0614667	0.0818686
COPT1	0.133438	0.112963
PEX3	-0.403901	0.89292
FHIT	0.142702	0.110994
TLE3	0.127571	0.109167
COMD5	0.259645	0.367557
MUC18	-0.0546519	0.0507999
ILK	0.0777098	0.0709831
PEX5R	-0.099077	0.159318
FBX6	0.0980889	0.173495
MSRA	0.0168044	0.0272389
ELOV5	-0.207914	0.654483
SBP1	-0.0139798	0.0115696
MARK3	0.279657	0.297527
PP14C	0.0564428	0.111188
AGRG1	0.0674802	0.0707128
R4RL2	-0.211405	0.135449
CFDP1	0.304786	0.343717
CACP	0.601266	0.896076
MICU1	-0.520097	0.901204
TTC9C	0.0397831	0.0901175
ABCF1	0.00606684	0.00772514
RCAN1	-0.551532	0.492972
NAA35	0.0820179	0.0732003
LMBD1	-0.646976	1.20982
NUD19	0.172225	0.46258
CCD91	0.501914	0.664281
ATGA1	0.718051	0.762335
TRM61	0.263043	0.597662
GSTA6	0.275063	0.506395
TPPC4	0.394849	0.536602
MAVS	0.235941	0.40506
LRRF1	0.198648	0.222857
CYLD	0.74188	0.996392
AT2C1	-0.634171	1.29322
PDK2	-0.798407	0.985207
DDX4	-0.10899	0.215145
MYO1C	0.376034	0.773536
COQ3	0.193967	0.321904
ICA69	-0.194973	0.338209
NELL2	0.245845	0.366193
U119A	0.111613	0.0975901
SNG1	0.112471	0.0682404
DDX46	-0.250423	0.38559
KC1G1	-0.119882	0.18635
DGLA	-0.0939807	0.0919826
ATP5S	0.312252	0.968661
BABA1	-0.181619	0.207566
F210A	-0.880356	1.29691
NUDT9	0.199543	0.244306
GMPPA	-0.0229548	0.0270073
GHITM	-0.0913975	0.0906924
STAM2	-0.418762	0.410099
AKAP2	-0.0550052	0.0642709
FRMD8	-0.660815	1.08729
CNNM2	1.29183	0.354032
TPPC3	-0.0833247	0.144593
DRS7B	0.384145	0.398717
PPDPF	-0.520096	1.1303
WBP11	0.18714	0.673374
CNOT9	0.57134	0.853264
TBCEL	0.463852	1.11534
EIPR1	0.275282	0.380856
DBND1	0.0511144	0.100683
LYSM1	0.023713	0.0269167
KAZRN	-0.0948159	0.245286
NLRX1	-0.0508348	0.0847727
MEA1	-0.19734	0.237103
AKTIP	-0.239835	0.551912
SUV3	-0.34429	0.798696
F110B	-0.362675	0.87184
LRC73	0.117808	0.105504
NAF1	0.720163	0.732421
SPIN1	-0.356584	0.983108
EMAL1	0.125639	0.252513
ZW10	0.0595227	0.0648443
EPN3	-0.166354	0.307584
RBM22	0.530321	0.731345
CEP43	-0.329313	0.392248
TKFC	0.147714	0.161663
DHTK1	-0.36853	0.573691
TCEA1	0.546608	1.14491
GILT	0.231912	0.706048
SARNP	0.240912	0.604382
RPAP1	0.0413318	0.118242
RFIP1	-0.347001	0.341716
UN45A	-0.434209	0.417413
SSRG	-0.113763	0.191475
ADCY5	0.739343	1.0582
FDFT	-0.14792	0.228524
MIPEP	0.262439	0.594111
CNTP1	-0.0879272	0.122075
LCAP	0.125262	0.15745
IR3IP	-0.116626	0.134804
NAGK	-0.090685	0.130633
DUT	0.474145	0.407295
RAB8B	0.415541	0.624657
RBM10	0.105635	0.300466
RB3GP	0.150595	0.306774
GBRB3	0.496879	0.954598
PCP4	0.646541	0.958488
STMN4	-0.414343	0.416694
CALY	0.61692	1.04514
2ABD	0.294347	0.831094
AAPK1	-0.145487	0.239938
HAP1	-0.0608056	0.0411114
EAA3	-0.134661	0.0630917
HUWE1	-0.517363	0.991554
RASA1	0.276207	0.396904
MK08	0.21132	0.284574
APBB1	0.20773	0.281809
RAB12	0.0845626	0.0471751
PACR	-0.0181908	0.017349
GRM3	-0.118368	0.280803
TIMP2	-0.0828192	0.209404
SL9A1	-0.109863	0.089398
SPRL1	-0.187312	0.317371
RS27L	0.390554	1.05351
PADI2	-0.48047	0.921815
CNR1	-0.108659	0.289314
GRIA3	0.114959	0.115515
FRIH	0.279052	0.401816
GBRG2	-0.289961	0.450597
LAMB2	0.135439	0.157801
LEG1	0.325981	0.528281
KCNA1	-0.336582	0.332048
PYGM	-0.0372538	0.0272805
PRPS2	0.114224	0.114798
RASK	-0.549578	1.04143
CXA1	-0.257401	0.241723
HEM2	0.419033	0.425892
S10A4	-0.0926096	0.222284
CLUS	0.394308	0.399808
RET1	0.325741	0.425291
2021-03-02	-0.0979995	0.0655876
MPP3	0.182397	0.235298
PK3C3	0.00687201	0.0145005
SMAD4	0.104856	0.100008
APBA2	-0.0334219	0.0503964
TIM23	-0.0113643	0.0135772
NDUF3	-0.150683	0.301599
RGS14	-0.134067	0.152988
UNC5D	0.311033	0.859814
RYR1	0.439836	0.900113
FBX3	0.274008	0.319101
MIC25	0.498568	0.68792
CL004	-0.0998386	0.164792
TTC19	0.34259	0.19301
PAK5	0.0134037	0.0120026
PRRT2	0.338807	0.390471
FRS1L	0.475276	0.955928
LYRM7	-0.613738	0.242354
CTL2	0.0875799	0.226267
MA1B1	-0.572328	0.651236
BAG1	-0.623424	0.501244
TMM11	0.522858	0.537797
C42S2	-0.284996	0.671692
GSTO1	-0.04467	0.11451
DYLT1	0.733823	0.755306
SYNPO	0.382964	1.11021
MECR	-0.208502	0.479111
FLOT2	-0.169854	0.652529
STX8	0.354339	0.525783
SC31A	-0.0700455	0.990224
SNP29	-0.082931	0.110854
VDAC1	0.111231	0.751455
SVOP	0.261471	0.443029
NP1L1	0.169208	0.83934
CTBP1	-0.140897	0.966544
MK15	-0.271362	0.95462
GIT1	0.0858898	1.07376
GMPR1	0.307902	1.10435
HOME1	-0.198658	0.770615
EPN2	-0.19327	0.378658
CADH2	-0.0758983	0.214557
LYRIC	-0.213702	0.398888
CNKR2	-0.0929842	0.119087
ACTN1	0.177981	0.776132
BPNT1	-0.00244778	0.014426
SMC1A	0.0105876	0.0104116
FLOT1	0.0325774	0.122845
RPGF4	-0.265633	0.626355
GSTM5	-0.222544	0.723366
VIGLN	-0.0136422	0.0334706
ULA1	0.0873956	0.483709
AGRL3	0.093539	0.286421
STX17	0	0
TMM33	-0.368794	0.927059
TSC1	-0.642342	0.51597
FADS2	-0.17831	0.37372
CLIC4	-0.143986	0.32497
PRDX4	0.171027	0.217809
GABR1	-0.270276	1.12849
NEGR1	0.169808	0.566327
OSGEP	-0.0181995	0.0457978
PPM1F	-0.26356	0.835362
HCDH	-0.0641694	0.318012
PECR	0.530503	0.57408
SYJ2B	0.49234	0.833047
ITSN1	-0.132438	0.639311
TIM8A	0.0166707	0.0255668
TIM9	0.138911	0.258971
SHAN1	0.199114	1.07331
PUF60	-0.155057	0.564167
KAD4	-0.0447393	0.333017
TOP1	-0.313327	0.386365
FHL1	0.182842	0.2375
SRC	0.188231	0.59477
TRPV2	-0.171861	1.20445
ATOX1	0.272181	0.522288
CTNB1	-0.091852	1.27497
STXB5	-0.0627814	0.155777
PSMD9	-0.147538	0.555994
PREB	0.180764	0.368893
BZW2	-0.14951	0.403045
GUAD	-0.144118	0.76926
VDAC3	-0.127888	0.573073
KCNH4	0	0
BAF	0.216512	0.356999
S4A7	0.589277	1.29027
TEN2	-0.0277563	0.0537754
PI42A	0.0977011	0.217711
UBP15	0.187116	0.562292
CXAR	-0.0779858	0.781555
GORS2	-0.247007	0.623189
2021-09-09	-0.148157	0.758223
ABI1	-0.317574	0.675866
FXL20	0	0
PCY1B	-0.494874	0.603621
NOP58	0.399708	1.16601
AGO2	-0.193972	0.282922
PHOCN	0.302765	0.723335
EFTS	0.166858	0.899951
PDE10	-0.111764	0.232272
RASA3	0.338496	0.523168
PACN2	0.205548	0.453801
OGFR	-0.0399251	0.0464354
SRCN1	0.0153237	0.0539884
PCS1N	0.452083	0.633518
DC1L1	-0.000219876	0.000957614
ACTN4	-0.00192948	0.0133876
LANC1	-0.247688	0.697995
NRP1	0.295016	0.842383
FKBP4	-0.231926	0.806734
DCTN4	-0.198346	1.22625
NSF	-0.054322	0.597638
SYGP1	-0.00529674	0.0224766
S22AH	0.0279555	0.0347119
NDUF4	-0.284214	0.438306
PRP19	0.0860076	0.386729
AACS	0.103261	0.0887139
ADRM1	-0.343929	0.955132
AIFM1	0.0914761	0.687347
KHDR3	0.348029	0.594243
AL9A1	-0.0230353	0.173159
NEUS	-0.298925	0.692184
STRBP	-0.0208896	0.0216788
PCLO	-0.301524	0.576854
ADNP	-0.0171054	0.0555639
SYNRG	0.250523	0.710685
HCN1	-0.0124392	0.0229498
CCS	-0.320791	0.521337
PRKN	0	0
RTN4	-0.0520635	0.415167
ATPMD	-0.275148	0.716606
UBQL1	0.0133463	0.0340321
2021-09-05	-0.00346278	0.0215694
F262	0.444229	0.642847
HGS	0.0638099	0.242936
EBP	0	0
CUL5	0.041603	0.134915
NHRF1	-0.240929	0.44175
RIMS1	0.0722443	0.146624
ILF3	0.00340771	0.0120328
GNA11	-0.0344487	0.0744939
SDCB1	-0.0591845	0.43326
S4A4	0.0300652	0.0959411
S38A3	-0.518574	1.15784
GRAP1	0.290939	0.888747
SFXN3	-0.0796419	0.530442
VAMP7	0.0295656	0.0677592
PSB7	-0.146239	0.303406
DPYL5	0.100783	0.601216
DBNL	-0.0628354	0.541212
TSNAX	0.437615	0.754602
XRCC1	0	0
DDB1	-0.0682482	0.135374
AN32B	-0.0573438	0.152716
PSD1	0.253496	1.24417
GLRX1	0.0864305	0.272075
NECA1	0.00676975	0.0129468
MAGD1	1.10977	0.367173
GNPAT	0.550922	0.781109
NPL4	-0.0338949	0.0757143
UFD1	0.0637725	0.0942627
SAC1	-0.0858328	0.0914543
CSPG5	-0.247095	0.72105
WDR7	-0.127347	0.444501
GOLP3	0.126241	0.242931
TPP1	-0.419346	0.771416
TALDO	-0.0452982	0.17481
SMBP2	0	0
CTBP2	-0.114751	0.17062
GAB2	0	0
KDIS	0.0363887	0.0867288
XYLT1	0.248531	0.295734
PABP1	0.0256579	0.260796
PROF2	0.156081	0.396705
DPP2	0.119903	1.10712
PICK1	-0.0862454	0.0729653
FUBP2	0.0560055	0.278519
ARC1A	-0.0227287	0.103835
HDAC4	0.0344854	0.0404018
MICU2	0	0
SGPP1	0	0
RWDD1	0.20412	0.39187
SNX1	0.114707	0.201851
LASP1	0.416835	1.12691
S14L2	0.187053	0.463679
PCYOX	-4.59e-05	0.000120798
UBA3	0.141911	1.26681
CBWD1	0.0169755	0.0239567
SMU1	-0.247523	0.611997
PLCB3	0	0
RGRF2	0.0814423	0.107721
CLAP2	-0.0550127	0.331093
NGB	0	0
AMRP	-0.217809	0.815521
YMEL1	0.271639	0.406355
SH3K1	0.143322	0.178118
LONM	0.122578	1.12465
PLCD	-0.125303	0.427821
ACBG1	-0.0261165	0.204388
FAF1	-0.863616	0.822615
2021-09-15	-0.0493369	0.0930815
PANK4	0.170982	0.433713
CYGB	-0.589108	0.812855
FADS1	0.111166	0.296881
SDHA	0.00183757	0.0107719
TXNL1	0.123208	0.345289
RISC	-0.0838817	0.151442
TFAM	0.202765	0.327732
VMP1	0.434048	0.644943
COR1A	0.138464	0.640469
LIPA4	0.242726	0.861367
LIPA3	0.154397	0.899865
2021-09-02	0.200836	0.735261
UCHL3	-0.201555	1.02032
FXYD6	-0.0357126	0.0533073
QKI	0.197147	1.09163
ZWINT	-0.166365	0.514814
OGA	0.00899139	0.0399386
ASGL1	-0.00340125	0.00676272
CCG8	-0.0462312	0.0806866
SELS	0	0
HNRH1	-0.260009	0.942651
HDGF	0.122203	0.11971
CSKI1	0.334501	0.794605
ACOT8	-0.0575865	0.0515462
CISY	-0.0443392	0.25935
RETST	0.155266	0.152283
CSTN3	-0.159455	0.402186
MFN2	-0.000342287	0.000773518
TIP	0.103293	0.343582
EHD3	0.108501	0.441188
MGLL	-0.264988	1.07046
STABP	0.197643	0.551664
TXND9	0.0274166	0.0412543
SNX27	-0.116398	0.593398
CBLB	0	0
OSBL1	0.123661	0.238008
L2GL1	0.0668412	0.360786
DCPS	0.0797675	0.245787
HINT3	-0.361457	0.630776
SCMC2	-0.343383	0.484134
ERC2	-0.191403	0.375792
PP14B	-0.0562206	0.0582148
NMT1	-0.116538	0.281164
MOT8	-0.263501	0.591065
SMCA4	0.115415	0.318341
SGPL1	0.0369881	0.0765657
HACL1	0.300339	0.559038
ELAV2	-0.185384	0.399815
NICA	-0.0288145	0.0466531
AGAP2	-0.10376	0.172233
RNZ2	-0.345838	0.374164
ARK72	-0.0969151	0.190618
CDC42	0.018854	0.0533985
CA2D2	-0.619774	1.04231
CA2D3	-0.139001	0.340521
SFXN5	-0.261415	0.963554
VCIP1	0.0300329	0.0322804
PPIL3	0.832179	1.18774
PSIP1	0.0644078	0.171266
CRYL1	0.226602	0.275732
RB6I2	-0.175107	1.21907
FAM3C	0.00340502	0.0047231
RIC8A	-0.122896	0.421719
S4A10	-0.00310977	0.0165117
SE1L1	-0.0355307	0.0962306
WASC2	0.172244	0.340434
T132A	0.524036	1.11022
FMR1	0.140751	0.115774
VAC14	-0.0131924	0.0168244
NDUAB	0.116619	0.42358
2A5B	0.0981378	0.221195
BIG2	0.0724588	0.122168
HAX1	0.146547	0.509991
MIRO2	-0.0264968	0.0818841
RT10	0	0
QCR8	-0.0789264	0.105906
SSRA	0.21618	0.217691
TCPD	-0.117843	1.07165
ILF2	-0.345156	1.21716
APMAP	-0.179435	0.539225
HNRPQ	0.108921	0.598492
SHRM2	-0.00449536	0.00488927
GCP60	-0.338426	0.67833
ZC3HE	0	0
PLPR4	-0.229241	0.709075
UB2V2	-0.0932823	0.237835
DEST	-0.0614792	0.175709
4F2	-0.104703	0.723963
VPS4A	0.0149925	0.0194973
LIN7C	0.754018	0.795236
CELF2	-0.166932	1.15577
NDEL1	-0.405979	0.522088
DYL2	-0.156247	0.847295
IQEC3	0.078965	0.0555887
PGPI	0.249593	0.772202
PCDA4	-0.0349465	0.0585076
TOM22	0.0319981	0.0622279
TOM40	-0.2913	0.789554
TOM70	-0.0881803	0.887126
RBBP7	-0.0885312	0.305555
NEDD8	-0.24074	0.321242
ARP19	0.344613	0.678258
IAH1	-0.021067	0.0609473
SUCO	-0.527721	0.425739
ABCB7	-0.172269	0.449409
MLP3A	0.329981	1.0607
PNCB	-0.0261227	0.0321673
PLPR1	0.143955	0.285105
ROA3	0.140735	0.336415
ERMP1	-0.0930528	0.335472
ETFD	0.201157	0.89614
SFR1	0.088542	0.0667642
DJB11	-0.147952	0.480489
VKOR1	0	0
S4A8	0.253803	0.334765
RTN3	-0.156705	0.662257
KIF5A	-0.272684	1.17999
ZNT3	-0.286725	1.25274
GNA13	0.267967	0.731136
DPP10	-0.0925389	0.142795
NT5D2	0.322491	0.595358
CNDP2	0.0402972	0.323455
ATLA1	-0.397905	0.720974
SKP1	-0.122108	0.566158
TBCA	0.132085	0.178767
RL10	-0.0763033	0.274694
ATP5L	-0.243338	0.934574
SRSF2	0.0977493	0.192174
NDUV3	0.589129	0.868925
VATE1	0.097535	0.378409
PQBP1	0.407684	0.474521
TPD54	0.122171	0.217691
TP4A2	-0.469663	0.987897
TBA1B	0.148	0.702924
EIF3H	0.263037	0.833211
TBB4B	-0.0302957	0.0920589
ASAH1	-0.144289	0.450553
BABA2	-0.0732727	0.0999398
BZW1	0.108506	0.390741
GPNMB	-0.125314	0.242717
SYWC	-0.0996335	0.555789
LYAG	9.38e-05	0.000506702
UBE4A	-0.308832	0.930653
SYSC	-0.000719997	0.00565332
LTOR1	0.310301	1.15859
HP1B3	0.152615	0.630923
EMAL2	0.214559	0.797162
ENTP5	0.188776	0.326101
GET1	-0.364605	0.495367
SNP47	0	0
DLDH	-0.104843	0.444059
OSTF1	0.126289	0.211689
MEST	-0.160124	0.640632
TCPG	-0.0650424	0.598935
CSN8	-0.0965843	0.220724
LCMT1	0.122962	0.180742
PLAK	-0.226513	0.517549
PDC10	-0.00822512	0.0210398
CUTA	0.227858	0.387439
DDAH2	0.0536728	0.235962
ABHGA	-0.362507	0.789037
BAG6	0.0701482	0.22694
PRC2A	0.196362	0.571668
ATAT	0.100117	0.877137
GNL1	-0.0254575	0.0209149
H31	0.419478	0.998562
AKA7G	-0.0146924	0.0213851
RN141	-0.0941054	0.319181
TS101	-0.123535	0.200442
HNRPU	0.136945	0.517927
HPBP1	-0.205419	0.864158
K1C10	0	0
ISOC1	-0.0376066	0.110702
RAB31	0.204448	0.338779
BAIP2	-0.0470814	0.129207
AHI1	0.0372356	0.0337596
UFC1	0.181929	0.678691
ATG3	-0.0960088	0.150377
ABD12	-0.181607	0.310687
RTCB	-0.125982	0.81994
QOR	0.372488	0.801983
ACY1A	0.192506	0.520227
SNX17	-0.040972	0.058057
HDHD2	0.326846	0.966604
NDRG3	-0.25259	1.0384
FAHD1	0.127778	0.289204
TM109	0	0
5NT3B	0.0100697	0.0102793
PHIPL	-0.157512	0.726251
DPCD	0.0560767	0.0722569
SF3B4	-0.335929	1.24262
EIF3D	0.049012	0.202507
CYBP	-0.196761	1.10308
SHOC2	0.0759405	0.500947
DCTN2	0.0219735	0.0912539
ECHD1	0.235616	1.27184
PRUN1	0.0435688	0.179835
SHLB1	0.113233	0.560705
PA2G4	0.0530527	0.16893
T106B	-0.0238733	0.0189023
RIPL2	0	0
T2FA	-0.0542241	0.0489951
THOC6	0	0
VP26A	-0.31472	1.03186
SCRN1	0.0344253	0.0686097
ARFP2	0.435484	1.12558
WIPI2	-0.18636	0.281851
DHYS	0.094957	0.137034
SCPDL	0.027059	0.0819065
MPRD	0.180268	0.281236
COQ8B	-0.142108	0.245208
AB17B	0.434574	0.667661
HNRH2	0.215131	1.19435
GLRX2	-0.270459	0.315269
JUPI1	0.0863005	0.195138
SF3A2	-0.556421	1.25023
RAB21	0.291352	0.302709
PAIRB	0.11297	0.528379
RENR	0.258556	0.430956
TMED5	0.510933	0.886293
HBS1L	0.0385244	0.0784117
STAU2	-0.517858	0.7558
SIR5	-0.0903342	0.174245
IDH3B	-0.0918807	0.735551
CSN3	0.0669788	0.274469
GLMP	0.504975	0.735398
ETFB	0.169335	0.492762
PYRD2	0	0
FBX7	-0.00125306	0.00282559
NUBP2	0.52856	0.322806
EF1D	0.282391	1.17788
TBA3	-0.0100029	0.0130221
EF1G	-0.137072	1.00529
SPN1	0.935161	0.612231
GELS	-0.15868	0.196127
PURB	-0.0978859	0.312393
PAG15	-0.278284	0.674489
SND1	0.160069	1.01226
MARE1	0.0226869	0.10495
S12A9	-0.0340793	0.0639571
SPAT2	0	0
SRC8	-0.196078	0.543984
AL1B1	0.118209	0.583334
NDUS1	-0.0117393	0.0862392
NUP93	-0.0902596	0.215908
HS105	0.0373443	0.247576
ARL8B	-0.0295357	0.100498
C2D1A	0.0606294	0.138812
SYQ	0.122398	0.496579
RM24	0.291376	1.12305
RMD3	0.461679	0.742681
NAGAB	-0.146113	0.90662
CP51A	-0.383649	1.18027
ADK	-0.192846	0.231185
PPP6	-0.306638	0.72501
PTPRS	0.0702226	0.528562
DECR	-0.0231997	0.0867501
AT2B3	-0.104519	0.720805
TPP2	0.0344366	0.209211
BACH	0.0524038	0.208266
AT2B4	0.162951	0.474547
CPNS1	-0.0398393	0.293945
LXN	0.471066	1.24798
EI2BE	0.311468	0.469953
PAK2	-0.119997	0.199964
PEX14	0.121214	0.199696
EI2BA	0.0181669	0.00844501
TECR	-0.00555611	0.00681374
PEF1	0.304572	0.484764
EHD1	-0.0673319	0.831422
CHAC2	0	0
PTN9	-0.173274	0.253515
DDX1	0.0585314	0.359926
NUD18	0	0
ATG7	0.117257	0.383289
OST48	0.00784924	0.0286508
RM09	-0.110556	0.289432
EIF3E	0.0376788	0.0873186
HEXA	0.186741	0.942867
MYG1	0.138783	0.192557
AL7A1	0.0853435	0.497719
SFXN1	-0.0622718	0.247573
RAB3D	-0.250005	0.550904
RAB3B	-0.14067	0.193457
KCND2	-0.384808	0.224573
PSME2	-0.15582	0.551425
PSME1	-0.33247	0.982285
P85A	0.00805268	0.00818707
GAS6	0	0
CRK	-0.0730774	0.216209
SYUB	0.063728	0.124862
RM23	-0.128035	0.273558
PRDX1	-0.0141508	0.0577085
CDC37	0.112692	0.452707
CP7B1	0.186435	0.463503
MERL	-0.302174	0.4156
STX6	-0.179016	0.28851
S12A5	-0.184373	0.693547
S12A4	0	0
DLG2	0.115365	0.751353
COQ7	0.234201	0.227156
HYOU1	0.0547597	0.510507
VP33B	-0.00548068	0.0113017
VP33A	-0.0015422	0.00378242
TPM3	0.241479	0.970083
NTRK2	-0.293493	1.19427
DOCK9	-0.0257896	0.0192188
PLST	0.120129	0.370706
TMEDA	0.164132	0.787657
PRS6B	0.136873	1.10742
PRS6A	0.107701	0.893208
MAP6	-0.173448	0.828902
SYN2	-0.0460914	0.175968
RFA2	-0.301926	0.475983
NUDC	0.14569	0.531234
TMED2	-0.337788	0.572826
RL14	0.22344	0.938007
RRAGA	-0.24381	0.673624
AKT3	-0.0175923	0.0534022
PTPR2	-1.31699	1.2284
KPRA	0.215841	0.414077
KCC1A	-0.506222	0.918196
ACOX3	-0.549964	0.791384
CSDC2	0.168981	0.346762
DX39B	-0.0771752	0.226599
TCP4	-0.482167	0.846113
AT1B3	0.232318	1.11831
NRX2A	0.10088	0.423523
NRX1A	0.0113154	0.0431657
PJA2	-0.238674	0.656399
NDUA5	-0.175246	0.713538
ACOC	0.0163073	0.105224
EI2BD	0.301342	0.73035
DCC	0.0984953	0.180919
ACSL3	0.0733707	0.128364
CR1L	0.259151	0.458003
CLK3	0	0
NUCB1	-0.109916	0.394991
PDIA6	0.222123	1.21643
PDK1	-0.158174	0.606078
ADDA	0.103686	0.779168
LAT1	0.115078	0.125136
ANM1	-0.116769	0.270421
SCFD1	-0.0492327	0.111572
KCMA1	0.384549	0.737803
MVD1	-0.0958059	0.224927
DPYL3	0.14476	1.03899
DPYL4	0.0272331	0.168802
DPYL1	0.153897	1.26621
NEDD4	-0.0683541	0.835959
GOSR1	0.295964	0.2497
PDLI5	0.147155	0.135767
SYNJ1	-0.0847922	0.469658
NLGN2	0.0784048	0.079108
NOL3	0	0
DC1I2	0.0163062	0.0518425
ROCK2	-0.118517	0.301075
GGH	0.479359	1.10362
ARFG1	0.222627	0.586071
ADDG	-0.104904	0.669233
HNRPM	0.150511	0.767378
EXOC3	0.335458	0.659579
EI2BB	0.0909657	0.343979
LSAMP	-0.00862936	0.0256769
MYH9	0.158518	0.792734
RBP1	0	0
FPRP	0.23779	0.358214
HAP28	-0.475138	0.909484
INP4A	0.164977	0.455891
UN13A	-0.0409028	0.0883261
SYT7	-0.248302	0.340364
RAB3I	0.483853	1.28113
NTRI	-0.0277894	0.10915
RCN2	0.297114	0.577717
DC1L2	-0.0803014	0.129681
DLG1	0.251762	0.85489
PTPRZ	-0.0810352	0.349084
ECH1	0.369465	0.542112
NMDE4	0.0900744	0.16153
GRID1	0.374986	0.373268
GSLG1	-0.218885	0.725483
MLP3B	0.239525	0.512915
MTA1	0.359501	0.562089
G45IP	0	0
PSMF1	-0.136242	0.181872
MCCB	0.26997	1.25881
MARE3	-0.0310148	0.144079
MGRN1	0	0
PELO	0.0154172	0.0220958
LETM1	-0.0333891	0.1622
TCPB	0.0120588	0.0639001
SYK	-0.238935	0.995106
CDV3	-0.129665	0.309648
TMX2	0.143512	0.26581
MFR1L	0.480418	1.14593
EPDR1	0.268141	0.519379
STRAP	-0.116558	0.520992
OCAD1	-0.357649	0.563173
ITM2B	-0.161122	0.307939
HIBCH	0.0489002	0.153448
AN32E	-0.161214	0.281517
ARMX3	-0.325919	0.538754
CPIN1	-0.382244	1.24287
ECSIT	0.0804319	0.207804
ECI2	-0.101165	0.332787
NCLN	0.29936	0.629329
VP35L	-0.0616109	0.120697
FXR1	0.408649	0.809878
ODO1	-0.031173	0.283652
GDIR1	-0.0916906	0.267183
IF4H	0.457985	1.28615
NC2B	-0.445828	0.541433
FBX30	0.433523	0.504204
CAPZB	-0.100619	0.509418
PIGS	0.257857	0.43332
CPSF7	0.381572	0.5164
THIC	-0.10178	1.07874
SYTC	-0.211925	0.980776
CARL3	-0.235301	0.259499
TAGL2	-0.208526	0.197333
SEC13	-0.0571402	0.177324
GOGA4	-0.0654184	0.0421587
FIP1	-0.562853	1.15338
UBA1	-0.0590896	0.452067
NP1L4	-0.0494114	0.497277
GTF2I	-0.32613	0.700581
CCD47	0.128718	0.311893
EMC3	-0.327157	0.362413
MCES	0.140356	0.315476
CRKL	-0.0186409	0.0432951
MESD	0.305301	0.725557
MAT2B	-0.0809866	0.223891
ERF1	0.159748	0.424565
CK054	0.146301	0.455723
PITM1	0.117961	0.271194
PYRG2	0.0672415	0.163027
SNX3	0.200436	0.831447
LTOR3	0.195296	0.392034
RBGPR	-0.230625	0.511575
LPPRC	0.0311872	0.259922
RRFM	0	0
MITOS	0.0098562	0.0145073
WDR1	0.00801374	0.0449815
GLYR1	0.0370872	0.0662241
EIF3G	0.320435	1.19619
SCOC	0.210533	0.835623
LRC59	0.0578592	0.254915
TWF1	-0.0557469	0.170412
SIR2	-0.0836737	0.364758
BAG5	-0.0168032	0.0861427
AKA12	0.249051	0.930557
TPRKB	0.0211714	0.020181
SPE39	0.382427	0.605281
KMCP1	0	0
ITM2C	-0.195239	0.809828
PTSS1	-0.0233828	0.037324
P5CR3	0.62493	1.10111
MITOK	0.118642	0.189985
PP4P1	0.263042	0.694166
SHLB2	-0.197553	1.28311
ENOPH	-0.278218	0.867143
PMGT2	-0.427898	1.11457
DCLK2	-0.0210853	0.0529175
FXL16	-0.0777368	0.0801767
QCR6	0.380728	1.04386
FAKD4	-0.24554	0.455753
CAPR1	0.0601978	0.12718
SCYL1	-0.0746081	0.163846
RN135	0	0
TPC13	0.461407	1.26873
GBA2	0.0729733	0.091404
NUDC2	0.249514	0.754084
PPM1H	-0.102449	0.560754
MOFA1	0	0
SERB	-0.0606588	0.21656
MAP4	0.0488984	0.140992
CIAO1	-0.238067	0.427069
CNRP1	-0.113852	0.539677
UBA5	0.121711	0.287267
PI51C	0.189428	0.998738
GCSH	0.040859	0.119883
KTI12	0.247469	0.515823
TMCO1	-0.730304	1.13942
TMED9	0.00387616	0.0128224
PEPD	-0.170172	0.670418
GLOD4	-0.137895	0.848209
MCCA	-2.19293	0.533407
SAR1B	-0.176957	0.439647
UBXN4	-0.184199	0.390508
LDAH	-0.321314	0.963345
ASPH2	0.160825	0.282737
MTNA	0.213381	0.672029
TACAN	0	0
MCATL	0.337288	0.295241
T126A	-0.315036	0.480753
PPCEL	0.10918	0.312014
IMPCT	-0.103059	0.3535
AIP	-0.0585367	0.125329
FA98A	-0.0377283	0.0349491
TBCE	0.171471	0.290223
MLEC	0.0169381	0.0284202
MBOA5	-0.327071	0.435083
DIK1B	-0.244247	0.346162
RELL2	0	0
RUFY3	-0.0215941	0.101251
R7BP	0.163922	0.915652
PLD3	-0.0441096	0.186696
ACAP2	-0.308883	0.69008
ARHG2	0.299325	0.784342
YKT6	-0.23238	0.779507
RAB18	-0.0597474	0.369738
TE2IP	0	0
UBP11	0.485089	1.13033
NGEF	0.0779145	0.106433
CYHR1	0	0
NDUA9	-0.14105	0.936233
TTC5	0.0902418	0.291798
FAF2	0.0275619	0.0602624
NTM1A	0	0
WASF1	0.0602448	0.275803
TXD15	1.02682	1.12178
CPNE9	0.142574	0.19256
FUND1	0.0687017	0.0511844
DHX30	0.110059	0.145824
UFM1	-0.107357	0.202139
PP4C	0	0
KAT3	-0.193769	0.725118
PELP1	-0.175632	0.856971
NCBP1	0.147731	0.0823582
PHYIP	-0.186267	0.867952
SPCS3	-0.401589	0.517087
F131B	0	0
DPH2	0	0
THEM4	-0.0640917	0.209605
PLGT3	0.234383	0.630057
PGAM5	0.0687731	0.0716885
NDUAA	0.0438537	0.207036
S2551	0.371136	0.796455
ATAD1	0.240176	0.47288
SYFA	0.0622761	0.23558
GHC2	0.387395	1.18243
UBP7	-0.190825	0.726806
BROX	-0.105971	0.282086
NAA11	0.668568	0.611699
CTBL1	0.224514	0.428248
HSDL2	0.163923	0.323162
CFA36	0.321536	0.439889
CDC73	0	0
PRKRA	-0.148661	0.512495
HSDL1	0.0724474	0.626434
PP4P2	-0.524151	1.12334
ARP3	-0.0605923	0.569414
GUAA	0.0540543	0.338066
WDR61	-0.237528	0.985239
MEP50	0.191771	0.69174
RT25	0.159427	0.247677
HDAC1	0.266053	1.23617
HOT	0.0649023	0.0832218
CHMP5	0.203865	0.549062
2AAB	0.203268	1.2373
OSCP1	0.308118	0.869293
MEMO1	-0.425038	1.07015
RD23B	-0.246799	0.734012
MFF	-0.132153	0.475014
GGACT	0.178087	0.43465
SC22B	-0.0957649	0.741713
KCY	0.0876629	0.561956
CPSF5	0.0352071	0.0949606
JAGN1	0	0
SYYC	-0.149005	0.531183
CT027	0.0598953	0.114525
DESI1	-0.258128	0.847575
AGFG1	0.0421365	0.0808977
ARPC5	-0.0741669	0.423242
MICLK	0	0
RMD1	-0.0203305	0.0342724
EIF3B	-0.250746	1.2378
NISCH	0.118514	0.385895
MCTS1	0.0758008	0.301212
EFHD2	0.512024	0.412655
SRPRB	0.119301	0.151785
RIPR1	-0.111665	0.31225
SPRY4	0.414018	0.464628
PPME1	0.00557214	0.0250396
STML2	0.186924	0.754939
COPG1	0.15019	0.907831
CARM1	-0.288422	0.507067
CFA20	0.674226	0.999464
UBXN1	0.0546667	0.169348
WDR18	0.119795	0.120303
CHTOP	-0.377426	0.510683
CZIB	-0.456422	0.626497
DJC10	-0.201047	0.227344
TXD12	0.329747	0.809449
ELP2	-0.0366137	0.0621171
EDC4	-0.161783	0.440986
CAZA2	-0.0862441	0.201469
PRRC1	0.344176	0.656937
HNRDL	-0.186084	0.665785
VAT1	0.0599371	0.181668
ARFG2	0.0571118	0.0996159
TBB2B	0.19787	0.499263
ATAD3	-0.112762	0.766443
IF6	-0.022965	0.028994
TOM34	-0.0673477	0.133933
MIC60	0.0544996	0.368329
NSG2	0.179057	0.329469
IF4A3	-0.218607	0.7756
MARE2	0.0967518	0.508332
FKBP8	-0.0796752	0.150958
RUN3B	0.255617	0.451657
UBE2Z	0.160998	0.139154
HEM6	0.0141116	0.0574533
BL1S2	0.327685	1.18869
AP1M1	-0.163172	0.906476
FUBP1	0.0833158	0.244334
AIMP2	-0.128024	0.270835
GALNS	0.147502	0.459061
SPNS1	-0.36216	1.04542
UBR4	-0.013521	0.0493014
AP4M1	0	0
KINH	0.00300042	0.0143992
PEX5	0.0647516	0.100375
TES	-0.242416	0.481761
CTTB2	0.229682	0.709107
FBP1L	0.0231837	0.0356804
MYH4	0.177459	0.341679
MGN	-0.100236	0.143249
RBM8A	0.54787	1.18224
EIF3A	-0.201183	0.578995
PCAT1	0.189989	0.321169
ASAP1	0.594897	1.14976
CRTC1	0.114466	0.193307
MYPT1	-0.0280904	0.0759361
GDPD1	-0.312757	0.735482
GBRL1	0.492351	1.22991
SRSF5	0.201096	0.440942
AAPK2	0.304397	0.625689
ADT2	0.0430048	0.224993
DYN3	-0.106268	0.601607
PGTA	-0.112901	0.686959
KAT1	-0.6989	0.904823
CNTFR	-0.298947	0.374218
CAP1	-0.033494	0.426565
SSRD	-0.389525	1.2404
EFGM	-0.153998	0.19533
GTR3	-0.0605333	0.298821
NRX3A	-0.0625213	0.123751
DREB	-0.0960302	0.467121
IF5	0.14925	0.545967
CAN2	-0.112641	1.29263
ATPO	-0.0719351	0.339142
KC1D	0.136464	0.340775
LIPL	0	0
NDKA	-0.147332	0.876826
ADT1	0.0489124	0.291958
ADDB	-0.0591366	0.186937
L1CAM	-0.070036	0.289404
DCE2	-0.0323754	0.153357
TENR	-0.214412	0.568669
AP180	0.0644172	0.278409
MYO1B	-0.248464	0.528208
RASN	0.13061	0.681393
NEUG	-0.211549	0.182766
SSRP1	0.187016	0.2562
ICLN	-0.535183	0.54297
FNTA	-0.123749	0.106882
SYVC	-0.165364	0.706048
GEPH	-0.16833	1.06842
NTRK3	0.160677	0.200144
PTPRA	-0.260931	0.923601
MPPB	0.135045	0.244356
CDK5	0.084496	0.276345
H2AY	-0.069917	0.0764171
SV2A	0.0493102	0.241658
AMPD2	0.153723	0.153629
FNTB	0.176665	0.519593
NAC1	-0.0592842	0.434764
PDE1B	-0.0897163	0.0922409
PDE2A	-0.11239	0.738506
UCHL1	-0.0149496	0.0513317
NMDE2	0.0935937	0.142028
H2B1	-0.0647275	0.246182
CSPG4	-0.427849	0.753303
VLDLR	0.259149	0.427034
GRIP1	-0.318044	0.62107
GAK	0.239739	0.630069
DHB4	0.172878	0.921926
S27A1	-0.148785	0.369881
CSN1	-0.224983	0.398247
CD47	0.0870566	0.17623
KKCC1	0.297931	0.990462
GRK6	-0.00412439	0.00718803
SHPS1	-0.0273435	0.119398
IMPA1	-0.0688769	0.306144
CYH1	0.214872	0.424952
SMC3	0.554357	0.891852
NRCAM	0.00443292	0.0253433
NFASC	-0.0669692	0.41047
FAAH1	-0.220798	0.86869
SYT12	-0.0328914	0.0434393
NEO1	-0.0558916	0.328246
NPTN	-0.08267	0.347918
THTM	0.024311	0.0887899
NF1	0.0517562	0.0329363
HMGCL	0.135476	0.351589
RLGPB	-0.124127	0.205851
CCD22	-0.532756	1.21621
ACL6B	0.0107393	0.0241304
NMRL1	0.610105	1.13794
PNPH	0.101407	0.467354
VINC	0.14918	0.518622
6PGL	0.167094	1.23196
ARPC2	-0.07308	0.468039
SNAB	-0.0922155	0.542457
6PGD	-0.204602	0.756528
EFTU	-0.013897	0.0582789
ACTZ	0.0548326	0.462068
VANG2	-0.41251	0.94608
D2HDH	0.102694	0.173986
RMXRL	0.108711	0.700804
H33	0.464396	0.760849
RL19	-0.173077	0.37717
AP2M1	-0.0587485	0.266889
ARF2	-0.165006	0.143182
DTNB	0.294606	1.28035
ENPP5	0.388626	0.773929
SMAD3	0.207445	0.202764
IMA5	0.0791486	0.340864
ELOC	0.0765373	0.384075
TBG1	-0.679292	1.09875
RL24	0.0377744	0.177684
RM40	0.245298	0.470713
GFPT1	0.014375	0.0235842
GNAQ	-0.0427386	0.240084
IF2G	-0.152476	0.964439
VDAC2	0.0685591	0.303581
RHG35	0.0369232	0.110135
COX8A	-0.459951	0.309767
AAKB1	-0.47467	0.409062
AAKG1	-0.132777	0.215438
HYES	0.24131	0.620313
DOPD	0.330645	0.930489
KYNU	0	0
BLMH	-0.0686793	0.935708
GSHR	-0.406194	1.03084
LMNB1	0.00145393	0.00730447
FAK2	-0.277573	0.390323
LRRC7	0.342869	0.439014
ACDSB	0.246486	1.16533
NUP54	-0.148909	0.141509
PGRC1	-0.1506	1.11559
TMOD2	-0.0913753	0.561157
EI2BG	-0.268554	0.445851
MFGM	0.213224	0.80901
LYPA1	0.15252	0.897042
TBB5	0.17924	1.2668
EDF1	0.247442	0.31292
NECP1	-0.136984	0.326893
NEUA	0.174533	0.272137
1433F	0.0900789	0.477299
TBA1A	0.06868	0.837225
KAPCB	-0.253689	1.13374
IF2A	-0.109834	1.28826
ACTC	0.863037	1.10835
CSK2B	0.229108	0.782467
PHB	0.0353231	0.275575
PP2AA	-0.331374	0.782633
PP2BA	0.0327551	0.436718
RS10	0.0157275	0.034407
RS12	-0.0682124	0.143298
RALA	0.0712093	0.250067
TYB10	0.547946	0.555713
UBC9	0.0507451	0.202428
IPKA	0.136659	0.280025
DYL1	-0.0198683	0.0614333
HMGB1	0.0789933	0.509147
CRNL1	0	0
UBE2B	0.0147112	0.0223441
1433Z	0.0829359	0.894241
CANB1	-0.484169	0.596979
GNAS2	-0.129649	0.602287
PTN	0.423545	0.507449
PP1G	0.0381252	0.030903
VATL	-0.357287	0.785555
IF4E	0.342578	1.0222
THA	0	0
ST4A1	-0.192997	0.424448
CPLX1	0.145886	0.332211
CH60	-0.00645773	0.0483296
DNJA1	0.0421073	0.107254
TCTP	-0.120329	0.420926
RAB3A	0.17417	0.619403
GRB2	-0.071825	0.311274
RABP1	-0.159886	0.536892
PROF1	0.0290412	0.186319
YBOX1	-0.0108902	0.0106051
CCG7	-0.0294666	0.0275965
RL11	-0.25104	0.99331
RL32	-0.0182028	0.0397666
RS3	-0.0116473	0.0377273
RL31	0.212417	0.389592
RL30	0.285111	1.21481
RS26	0.296611	0.745066
RS25	-0.0585888	0.356024
RS24	0.218859	1.27886
RS15	-0.069534	0.0887636
RAP1A	-0.118318	0.371596
RL23	-0.184812	0.503765
VATB2	0.169632	1.08532
H4	0.0284607	0.087369
MTPN	0.163172	1.10766
RL23A	-0.128178	0.724649
HPCL1	-0.0168553	0.0258724
RHOB	-0.0171295	0.0440359
AP2S1	-0.32344	1.19003
RL18A	0.143115	0.639937
PP2AB	-0.0755291	0.525777
RS4X	-0.0161621	0.0669184
CNBP	0.0839207	0.107616
EF1A2	0.19446	1.14291
DLRB1	-0.138868	0.883497
T22D1	-0.232069	0.806726
RB11A	-0.305233	0.331113
KCAB2	0.0908158	0.152293
RL7A	0.0462424	0.233446
ARF6	0.158682	0.534091
TYB4	-0.390979	0.931474
RS13	-0.0439415	0.267187
RS29	0.491323	0.97363
RS23	0.352182	0.86513
1433E	-0.16786	1.11479
UB2G1	-0.404476	1.02218
RS16	-0.110344	0.556413
RS15A	0.0990664	0.365757
RS8	-0.0698995	0.348013
PRS8	0.054779	0.263452
PP1B	0.107566	0.308447
PP1A	-0.0211784	0.0603121
RS7	0.0440201	0.195702
TIM8B	-0.271083	0.499228
TIM13	0.202329	0.542511
TIM10	-0.0433575	0.0948628
1433G	0.14479	0.845046
SUMO2	0.050181	0.0699444
ARF4	-0.283783	0.71288
RL37P	-0.148449	0.317287
RL27	-0.131906	0.398366
RL15	0.0807257	0.321353
STX1B	-0.296816	0.998625
RAP2B	0.011801	0.0568862
ARL1	0.122444	0.211195
ARF3	0.0444266	0.0424776
CSN2	0.10038	0.974567
FGF12	0.135051	0.236377
UB2D3	-0.0326082	0.153528
PSA6	0.116394	0.583328
PRPS1	0.0201405	0.0689432
SNP25	-0.268053	0.819738
CIRBP	-0.0308129	0.0370733
ACTB	0.475161	0.467468
PANX1	0.219215	0.460757
GBRL2	0.39577	1.10245
SNAPN	0.208532	0.387292
RUVB1	-0.0572827	0.250221
SMS	0.0226718	0.0211163
GNAO	-0.102076	1.14603
STRN3	0.15209	0.204158
MAAI	0.0804007	0.195954
SCAM1	-0.26761	0.973037
IDHP	-0.0961538	0.541104
KIF5C	0.545984	1.29414
ADRO	0.00132908	0.00271777
NH2L1	-0.345016	0.483927
DSRAD	-0.11437	0.158976
CASP3	0.113765	0.274936
NCKP1	0.0567621	0.421326
PGCB	0.460956	1.16536
FABP5	0.0573439	0.168764
FABP7	-0.00509877	0.0192961
EPHA5	-0.0422165	0.121303
BCAT1	-0.202943	1.07181
PLAP	-0.0929616	0.301971
CA2D1	0.0159773	0.063853
CACB1	-0.31478	0.746687
AP3M2	-0.0833702	0.952882
AP3M1	0.233443	0.683998
B2CL1	0	0
PYGB	-0.0301895	0.284056
PPP5	-0.0206834	0.0561302
PDLI1	0.232085	0.381573
EFNB1	-0.397199	1.01774
RIDA	-0.0542267	0.0893438
STA5B	0.663954	0.511771
STAT3	0.140441	0.511419
NDUS6	0.305018	0.913718
CAP2	-0.0774184	0.214167
AP1B1	0.121966	0.701785
CLCN4	0.749918	0.644526
GPC2	0.114693	0.371805
SSDH	-0.106428	0.886248
RENBP	0	0
RED1	0	0
RAB4B	-0.151863	0.391601
HD	-0.265295	0.51289
GABT	-0.0309903	0.316403
F10A1	-0.148276	0.689111
GATM	-0.0441796	0.335041
ARSB	0.0447201	0.128806
IPP2	0.102913	0.103667
VATF	-0.296391	0.955027
GDIB	-0.0148428	0.131548
GDIA	-0.0480508	0.395199
RGS7	-0.0606895	0.176855
NUP98	0	0
DGKB	0.271836	0.748086
DGKG	-0.292957	0.513878
ODPB	-0.0128995	0.0956066
RS3A	0.0600655	0.294874
ITB1	-0.266065	0.39269
GRP75	0.0313171	0.272878
LMNA	-0.11242	0.6429
GSH0	-0.35705	0.585064
TPIS	0.0867451	0.37892
LSS	-0.110823	0.637181
ANXA6	-0.118086	1.22202
PSA7	-0.0667426	0.201678
NPTX1	-0.193539	0.481932
DPYL2	0.00857523	0.054902
CSRP1	-0.148186	0.429805
SCG3	0.393086	1.26941
PFKAP	-0.00830501	0.06448
PFKAM	-0.0100162	0.0640547
CALB2	0.049622	0.280255
CBR1	-0.112639	0.652631
RP3A	-0.259312	0.818109
NRDC	-0.117685	0.250593
RL22	-0.0567611	0.181818
AKT1	-0.256705	0.57369
BIEA	-0.230312	0.684261
ACADV	0.320975	0.659641
COF1	0.105031	0.330497
PPT1	-0.142874	0.574837
GBG7	0.586598	1.09445
MATR3	0.0321862	0.204303
APEX1	0.0178373	0.0573827
MTOR	0.0902877	0.257248
GRIK3	0	0
LDHB	-0.0440701	0.128591
IDHG1	-0.0831318	0.35892
IDHC	0.0989669	0.795298
USO1	-0.00171684	0.00354656
TOP2A	-0.223677	0.328983
PTN11	0.0407112	0.164735
PPAC	0.0622043	0.165286
RL13	-0.00571999	0.024767
SYT3	-0.0624082	0.225745
DKC1	-0.484357	1.24255
PSB2	0.0743951	0.338006
CD9	-0.0682871	0.125268
PSB3	0.152506	0.79915
KAD1	0.0372735	0.36384
DYN2	-0.233201	1.11365
MPC2	-0.21799	1.21105
LA	0.0523516	0.181387
PGM1	-0.122466	1.05149
DYHC1	-0.0691106	0.965126
ARL3	-0.1209	0.520755
SYUA	0.122563	0.390977
MT3	0	0
NU155	-0.100882	0.0798134
GPX4	-0.13922	0.257867
2ABA	0.0564994	0.141044
MP2K2	-0.073561	0.0610186
CRIP2	0.199182	0.361862
PPM1B	-0.067835	0.307495
ACYP2	-0.0532924	0.106274
ODBB	0.143196	0.581532
PRDX2	0.477515	1.05017
GPDM	0.027281	0.206348
CALX	-0.0533125	0.356063
IDE	0.0869955	0.253054
PAK1	0.107513	0.574579
NMDZ1	0.0565046	0.0957331
ATPG	-0.0611256	0.26094
ATPD	0.485345	1.10026
PUR1	0	0
RL13A	-0.0920324	0.239619
RAB15	0	0
RAB10	-0.309469	0.803065
RAB8A	-0.0796888	0.103891
PTN5	-0.566934	0.879595
GPC1	0.0284784	0.158787
MAP1A	-0.00378178	0.0397122
PSB4	0.197825	0.897834
PSA5	-0.0260039	0.0625817
HS90B	-0.0506517	0.485951
OPCM	-0.103192	0.606426
CSK	0.138809	0.364647
QCR2	-0.18817	1.0771
CBS	-0.285228	0.665727
EZRI	-0.103628	0.754137
S6A17	-0.2245	0.468208
S6A11	0.0218113	0.0939515
EAA2	0.0348336	0.132954
GRM5	0.139986	0.271669
ATP5H	0.0185327	0.0914049
PEBP1	-0.095759	1.15248
DLG4	-0.132936	0.36196
AL3A2	-0.120484	0.250257
PFKAL	-0.150079	1.20086
GSTT2	0.493025	0.97087
PLEC	0.213596	0.777141
LKHA4	-0.114405	0.444857
MARCS	0.0222615	0.0448333
ITPR1	0.448405	0.173591
NOS1	0.0015623	0.0033044
SERPH	0.0422012	0.209054
ATP5I	0.529698	0.979535
ATP5E	0.058835	0.146681
KAD3	-0.0850475	0.124226
KAD2	0.301587	0.721031
RINI	0.139491	0.500731
3HIDH	0.0558156	0.209384
BDH	0.0961551	0.37709
PPIF	0.460596	1.13223
ARRB1	-0.252389	1.04957
SC6A7	0.078127	0.173235
TCPA	0.0738831	0.667151
PSB6	0.355109	0.593359
SSBP	0.0229469	0.0147479
AL1L1	0.303865	1.10037
RS2	-0.038677	0.207925
DHSO	0.171275	0.52791
KAPCA	0.00904993	0.0192466
SCRB2	-0.135241	0.830246
HPRT	-0.0866783	0.554699
ICAL	0.0945806	0.122316
PARP1	-0.12833	0.110425
ARBK1	0.00767487	0.0174435
CH10	0.0247944	0.0471258
BASI	0.0845113	0.279637
ODPA	0.138368	0.558366
KCRU	0.0252989	0.071522
AGRIN	0.0783119	0.0438675
RPN2	-0.0775966	0.455394
PGAM1	-0.20398	1.25613
EAA1	-0.184854	0.548577
AKAP5	-0.25727	0.51796
GSTK1	0.106026	0.602565
GRP	0.200323	0.375357
PPIB	-0.0352131	0.288331
THTR	-0.0617728	0.189272
CATD	0.360745	1.28904
RS5	-0.0584538	0.0965169
SC6A1	-0.306507	0.697939
ECI1	-0.0913238	0.415205
HMOX2	0.0805082	0.116299
GBRA2	-0.40963	0.960962
AINX	0.0785376	0.638369
COPB	-0.170622	1.02804
GRM1	0	0
RL12	0.0368471	0.155974
HMCS2	0.475578	0.505409
COMT	-0.00254983	0.0118602
FBRL	0.164113	0.192162
ADCY3	-0.0826623	0.0728466
THIKA	0.0359559	0.166816
MK03	-0.189086	1.08227
SYT1	-0.0843655	0.793329
PSA4	-0.229131	0.585743
DYN1	0.0514985	0.761871
ATP5J	0.361557	0.725634
RL6	-0.150561	0.806347
AOFA	0.0774781	0.33478
NEST	0.480179	1.00842
MA2C1	-0.256395	0.62415
UCRI	0.269661	0.629436
ARLY	0.0326148	0.0697251
PP2BB	0.102234	0.412968
PPM1A	-0.103851	0.108454
GCYB1	-0.0645825	0.0968547
RL21	-0.0879296	0.227166
RASH	0.128515	0.688276
VGF	0.22864	0.496873
NB5R3	-0.157818	0.682135
MPPA	0.197217	0.403542
RLA0	-0.0215927	0.126275
RLA1	-0.115639	0.288414
PCY1A	0.322442	0.348686
NDKB	0.148029	0.773198
GCYA1	-0.0463402	0.15228
AOFB	-0.141918	0.227745
GNAZ	-0.144066	0.389074
NFL	-0.014064	0.0388701
AT5F1	0.0330003	0.145345
GRIA2	-0.196385	1.29722
GSH1	-0.154799	0.50355
HEM3	0.238673	1.19017
TAU	0.092906	0.37947
NDUV2	-0.0479102	0.188189
CSK21	-0.0675895	0.569815
ML12B	-0.138564	0.966381
AP2A2	-0.00252448	0.0129001
RL27A	-0.31203	0.815969
PSA3	0.104086	0.151735
PSA1	-0.0395748	0.2498
CALR	-0.0758472	0.352386
CSDE1	0.062046	0.199825
SPRE	0.0473605	0.0858922
GSK3B	0.0670568	0.177163
GSK3A	0.209424	1.03117
ACSL1	-0.0591528	0.152942
DCE1	0.13295	0.471501
THIL	0.153442	1.14792
RL28	-0.265757	0.710633
HMCS1	-0.171617	1.0428
KIME	-0.0547055	0.12567
PSA2	0.154678	0.402475
FUCO	0.0603548	0.272792
RSMB	-0.0404538	0.179602
RL35	-0.014278	0.0300282
RL9	-0.0188518	0.0689772
RS19	-0.0391041	0.276927
LAMP2	0.187176	1.21947
SPRC	-0.0294409	0.0401903
ABCD3	-0.169023	1.2606
ACLY	-0.054189	0.253885
VEGFA	-0.0332022	0.0689862
MYL3	-0.23753	0.537238
ATPA	0.170954	0.993843
APLP2	0.416196	1.02973
KCC2D	0.0365651	0.12916
ACADL	-0.0310496	0.160285
MAP1B	-0.132281	0.7224
SYDC	0.030259	0.143589
GSTA4	-0.132386	0.491537
AMD	-0.242884	0.511907
CYTC	0.551786	1.02763
ANXA5	-0.0303986	0.0444127
ECHM	0.0963967	0.346904
LAMP1	-0.10962	0.273545
FUMH	-0.13678	0.484422
PDE4D	0.0667544	0.117558
ARAF	0.376759	0.695593
PRIO	-0.202454	0.497615
ETFA	0.0666394	0.22168
MAOX	0.0694258	0.389661
ACPH	0.0707163	0.197495
STMN1	-0.0922693	0.226834
AT1B2	-0.107535	0.370456
THIM	-0.0695003	0.253886
GLSK	-0.0478447	0.485112
KCC4	0.143405	0.343294
CN37	0.0738305	0.129692
AATC	-0.0219802	0.233385
SUCA	-0.0302918	0.0931801
NPM	0.0633799	0.371035
NFM	-0.121046	0.449732
FAS	-0.0126707	0.138317
RL26	0.0156749	0.0521019
ADHX	-0.129925	1.07587
KAP3	0.0766606	0.384792
KAP2	0.0972279	0.609045
IVD	-0.0232709	0.0775617
RL18	-0.147672	0.265141
ODBA	0.291149	0.505017
ALDH2	0.045523	0.336958
KCC2G	0.0301747	0.138385
NU2M	0	0
NU5M	-0.243288	0.929449
PO210	0.0198288	0.0340513
PDIA3	0.063086	0.57814
DMD	0.377189	0.481293
AT2A2	-0.0485206	0.326509
AT2B2	-0.0200657	0.0685381
ACACA	0.303547	1.03803
DHPR	-0.227877	0.889627
RAF1	0.114437	0.122388
KCC2A	0.119645	0.562464
RL34	0.105545	0.266457
COX5A	0.502959	1.23445
ACBP	0.326621	0.817108
SAP	-0.0889328	0.429143
COX41	-0.169809	1.16793
DHE3	0.12273	1.17894
GNAI1	-0.0859714	0.849899
CX6A1	-0.206985	0.578986
SAHH	-0.14776	0.926648
PLCD1	-0.278051	1.11676
PLCG1	-0.055762	0.0804679
RAB1B	0.176162	1.15743
SCG2	0.429237	0.251384
NDUB1	0.0161777	0.0629722
HS71B	-0.199414	0.987811
SGIP1	-0.0579295	0.161266
OCC1	0	0
LRC4B	-0.144717	0.632771
H2A2A	0.0707017	0.150213
YLPM1	0.109948	0.11429
ANS1B	-0.10628	0.221288
FEM1B	0	0
SPKAP	-0.0630974	0.0488386
GRP2	0.0611377	0.169397
TTYH1	-0.209683	0.723141
MAP1S	0.106255	0.46655
MANF	-0.00379235	0.00866301
S2542	-0.0445825	0.0481765
AL4A1	0.0137327	0.031582
RM10	-0.00477566	0.015583
RM30	0.21757	0.333792
RM22	0	0
AAK1	0.242013	1.10112
H2AZ	0.669015	0.633838
VPS36	0.160837	0.330702
VPS25	0.363791	1.0079
SYN1	-0.0571088	0.338294
EPHB1	0.279295	0.744962
GLNA	0.019856	0.147526
RAB7A	-0.00703307	0.0423515
TPM4	0.0969542	0.0833101
KAP0	-0.104131	0.180021
NFIA	0	0
ALDOC	-0.00929878	0.0312555
ASSY	0.14474	0.350441
GNAI3	0.321903	1.12178
ODP2	0.0688074	0.343034
KCC2B	-0.00967915	0.0674305
CLCB	0.432412	1.1461
CLCA	0.186798	0.776829
GSTM7	-0.0200551	0.0675278
ALDR	0.121635	0.426616
NEUM	0.240241	0.187459
HYEP	-0.0141242	0.0292275
PCCB	-0.144419	0.845308
SODC	0.0132749	0.019293
AT1B1	0.0767251	0.323857
KCRB	0.110319	0.475448
CALB1	-0.0294521	0.0749751
CATL1	0.429459	0.866383
RPN1	-0.102714	0.802819
DPOLB	0.297583	0.209198
HMOX1	-0.40663	0.459824
BIP	0.0958704	0.533866
AT1A3	0.0275401	0.193219
AT1A2	-0.0185423	0.107257
AT1A1	-0.0562301	0.464895
ERBB2	0	0
NQO1	-0.415736	1.13894
RS21	0.4802	1.01517
RAB4A	0.129855	0.448768
HXK1	-0.0993574	0.659563
KPCA	-0.160266	0.77188
COX1	0	0
RL7	-0.16723	1.03856
G6PD	-0.24269	0.578522
FPPS	-0.133309	0.441133
EF2	-0.0393901	0.349741
ALDOA	-0.154246	1.25229
GSTM1	0.131176	0.423235
GSTA3	-0.0547401	0.126083
GNAI2	-0.00954517	0.0412523
PDIA1	-0.0701228	0.78356
SCN2A	-0.343624	1.06549
ENOA	0.0298171	0.280376
TPM1	0.688596	0.710485
RL35A	0.226817	0.498566
RS17	0.101529	0.40597
S100B	-0.170042	0.43199
PTMS	-0.407009	1.14621
ROA1	0.191001	1.06019
OX2G	0.122988	0.31834
CYB5B	-0.397727	0.958293
NSG1	0	0
APOE	0.14628	0.785161
RLA2	-0.0474411	0.166613
H2A1	-0.847937	0.409313
CYTB	0.10491	0.227891
CATB	-0.0625727	0.453583
KCRM	0.158339	0.877783
AATM	-0.00719155	0.0615978
COX2	-0.0715806	0.285888
NCPR	-0.088409	0.347022
TRXR1	0.0546067	0.177827
MDHC	0.0386305	0.150054
MOGS	0.019406	0.0309411
AGRL1	0.156241	0.86927
PTN23	0.0862343	0.353795
AKAP1	-0.530069	1.00793
GABR2	0.0259588	0.0245278
KKCC2	-0.0345185	0.0537961
ACSL5	-0.49765	0.743561
PNPO	0.160946	0.392564
BSN	0.153901	0.468652
PSMD1	0.139931	1.05988
TAOK1	-0.11094	0.196186
PCY2	-0.450367	0.933315
HSP74	0.045762	0.58928
PACS1	-0.153369	0.884791
PDP1	0.287868	0.990632
SAFB1	-0.487812	0.74323
PI42B	-0.0583108	0.184043
PI42C	-0.0912225	0.169247
RBBP9	0.114804	0.271151
EPN1	-0.163895	0.935289
SLIT1	-0.227019	0.398065
ACOT1	-0.167914	0.856974
ABCB6	-0.237764	0.426513
SGTA	-0.133374	0.343124
ANK3	-0.0634125	0.392719
SYN3	0.275737	0.492034
HCD2	0.00764124	0.0521704
TRIM3	0.148132	0.672409
STX7	0.0552099	0.329839
PPCE	0.0592731	0.246097
SHC3	0.11495	0.343711
PDPK1	-0.350998	1.22806
ACOT2	-0.0822115	0.287391
VPS52	0.136949	1.04721
CLIP2	-0.0427317	0.161418
GAS7	-0.462363	0.761725
ARHG7	-0.167345	0.531811
PICAL	-0.0708572	0.454875
RGPA1	0.497593	0.527644
ROBO1	-0.340938	0.666031
XPP1	-0.11962	0.8377
EXOC8	0.00407875	0.0190188
EXOC7	0.184208	0.677376
EXOC2	-0.0819863	0.128741
MRCKA	0.273292	0.738309
SORT	-7.45e-06	2.15e-05
CADH8	0	0
SMRD2	0	0
VAS1	0.0690556	0.236679
NCKX2	0.439494	1.27354
NSF1C	0.0512785	0.0880811
AFAD	0.0621109	0.18126
NEB1	0.378921	0.398589
CORO7	-0.00653904	0.0135423
DNJA2	0.00685466	0.0318077
MBB1A	-0.135682	0.269192
DNPH1	0.284763	0.210231
ENTP2	-0.183732	0.253622
CALU	-0.316538	0.717861
NPTXR	0.281905	1.18273
MOES	-0.0873455	0.208013
IDI1	0.0215922	0.0934972
PUR9	0.0709877	0.587603
RABE1	0.0532756	0.140109
ACSL4	-0.0704548	0.314146
RB11B	0.0727743	0.262018
VIAAT	0.123047	0.158275
APBA1	0.110473	0.137391
SRBS2	0.016399	0.0369759
SI1L1	-0.0289361	0.0566843
GBB4	0.241962	1.10117
FAK1	-0.612544	1.15541
PDXK	0.76579	0.924991
DNM1L	0.0266085	0.115989
NRP2	-0.262217	0.917606
NEB2	-0.0323373	0.0878073
PA1B2	0.0961742	0.273715
PA1B3	0.136557	0.694676
GORS1	0.394835	0.533956
PRDX6	0.112065	0.672142
MINP1	0.351008	1.20161
SH3G3	-0.0895816	0.337552
GOSR2	-0.0439239	0.0924921
HSP13	0.0405058	0.0555452
CTND2	-0.0737571	0.212864
CD166	-0.0286921	0.221786
NCDN	-0.0645107	0.313294
TIM44	-0.191005	0.192987
GPDA	0.553785	1.22574
NSMA2	-0.275305	0.437212
ELAV4	-0.0670461	0.337917
T2AG	-0.779824	1.07186
MADD	0.190586	0.834489
AMPH	-0.0812067	0.18848
CDC5L	-0.237899	0.198353
IGBP1	0.540687	1.22502
WASL	0.286243	0.690618
GLYG	0.367589	0.842255
EVL	0.0287631	0.0321464
ARGI2	-0.647085	0.742491
VPS45	-0.288704	0.795674
ARL2	0.0770191	0.255221
MARK1	-0.0650338	0.0992485
PI4KA	-0.0324761	0.108723
SERA	0.0419415	0.525838
TIF1B	0.150468	0.657698
KPRB	-0.100649	0.233596
DDAH1	0.00109698	0.00528699
HAP40	0.00155548	0.00240863
RAB5A	-0.125685	0.340491
IGS21	0.0207806	0.0449991
CPNE7	-0.388571	1.01105
HNRPC	-0.0815836	0.276479
LRP1	0.0208557	0.123727
PDCD6	0.0847143	0.287546
STX12	-0.171709	0.933389
SRSF6	0.172247	0.304471
TPR	0.0194743	0.0422709
KPCI	0.179409	0.219553
KI21B	0.15297	1.05854
KIF1A	0.134597	0.743507
EPS8	-0.184052	0.199551
RPGF2	0.0628124	0.278249
FARP1	-0.170276	0.59754
BCR	-0.368613	0.577191
AUHM	-0.336174	0.811611
WDR26	-0.00251933	0.00689512
TANC2	-0.190668	0.20213
VPS50	-0.680268	0.670822
LIMA1	-0.1516	0.545013
NECA2	-0.195335	0.26046
RHG44	0.180996	0.488814
HNRPL	-0.0658997	0.215687
MINK1	0.0523536	0.164819
U520	0.0964088	0.408028
PPM1G	0.276152	0.507487
PSD11	0.026375	0.107851
YES	-0.100615	0.279934
IMDH2	-0.103254	0.16194
CAMP2	0.350378	1.0165
IMPA3	-0.116893	0.135786
PLRKT	0.0280862	0.0374622
STON2	0.181429	0.196886
NNRD	0.114733	0.639759
GP158	0.0531892	0.158537
BIG1	-0.309816	0.316819
SPTC1	0.408294	0.771828
SRGP2	-0.112206	0.417655
CPNE1	0.0913793	0.116713
LRFN5	0.241748	0.802815
BDH2	0	0
CACB4	0	0
KLH22	-0.18025	0.679803
FCHO2	0.219854	0.508538
ITPA	-0.0551008	0.32634
PXL2B	0.251782	0.792101
TPPC2	0.259704	0.263756
RIPL1	0.20051	0.266222
TMED7	-0.306706	1.13452
PLPL8	-0.189034	1.07787
TRIM2	-0.0671364	0.393369
BRSK2	-0.136042	0.23319
IMDH1	-0.305891	0.457486
TAM41	-0.356437	0.78782
MACF1	-0.0199433	0.0850593
OCRL	-0.450908	0.957465
M3K10	0	0
MY18A	0.110525	0.354245
PCDH8	-0.185797	0.344915
PGP	-0.0589209	0.0566748
UB2D1	-0.224574	0.505918
CHD5	-0.545752	0.671724
H15	0.0437077	0.0793377
PISD	0.514978	0.86926
ATPK	-0.00536524	0.00920293
MPP2	0.156199	0.542917
RRAS	-0.135135	0.398154
CAMP1	0.15352	0.185292
GTPB1	0.334538	0.481842
SAHH2	-0.191346	1.1838
EIF3C	-0.0414875	0.12545
PATL1	0	0
ELAV1	0.00258587	0.00781783
CUL3	-0.386077	1.14676
MMGT1	0.252893	0.43352
SNPH	-0.0084649	0.0124977
MRPP3	-0.0348531	0.0367115
XPP3	0.504735	0.454165
ERLN2	0.227971	0.65257
NIBA2	0.0581044	0.167158
DP13B	-0.370731	0.683816
2021-09-11	-0.176915	0.913256
VPS29	-0.014302	0.0278077
REEP5	0.423275	1.26417
FAHD2	-0.39571	1.18089
TACO1	0.480934	0.59772
SPAST	-0.37175	0.683871
PTPRE	0.267857	0.375874
NCEH1	-0.309414	1.22706
SCOT1	0.143616	1.25175
CAZA1	0.195576	0.844056
IF2P	0.0110599	0.00821425
BRSK1	0.247108	1.26612
ARM10	-0.357417	0.580774
STK24	-0.0993654	0.514945
RYR2	-0.669041	0.97978
CISD1	0.0205799	0.0365524
NNRE	-0.106127	0.216076
EMC2	-0.0650252	0.102828
2021-09-08	-0.291656	0.782796
ESTD	0.0931653	0.497799
EIF3I	-0.12192	0.453641
COTL1	0.0853139	0.186822
F136A	0.0733002	0.146521
PSD13	-0.0325479	0.0876445
SGT1	0.120381	0.257238
MCRI1	-0.149231	0.288557
PFD2	-0.0370562	0.131438
TM163	0	0
TPRGL	-0.137097	0.671456
ROA2	-0.114571	0.941064
CLVS2	0.0163135	0.0297186
CLVS1	-0.154892	0.216553
PBIP1	-0.0371886	0.0543573
TIPRL	-0.217113	0.60364
TM214	-0.311436	0.434171
APC5	0.091399	0.107473
NUMBL	0.0661318	0.2169
ARP5L	0.313564	0.412608
SHOT1	0.192533	0.444439
CHID1	-0.254839	0.866778
OLA1	0.0921592	0.545965
ORNT1	-0.0446228	0.0802437
ZO1	0.147762	0.224762
MTMR6	0	0
TRI46	-0.00859015	0.0115777
GGA3	0.364138	0.749002
IQEC1	-0.374089	0.706111
ABR	-0.0146566	0.0754207
DNAL1	0.213789	0.322891
ENPL	0.0855869	2.07952
KPYM	0.0922675	1.51873
UGGG1	0.105811	1.30977
TERA	0.118354	2.5684
STIP1	0.128874	1.76057
CSN4	0.131955	1.40547
ATPB	0.135529	1.37331
CRYM	0.14798	1.39198
ECHA	0.154711	2.12639
KPCE	0.155852	1.65498
COPD	0.15598	1.48516
FSCN1	0.157826	1.54565
GLRX3	0.164794	2.03614
ENOG	0.167211	1.32351
AMPL	0.168071	1.4709
MYL6	0.170159	1.39094
GBB1	0.170231	1.31178
GBB2	0.172233	1.38251
PPIA	0.17248	1.62449
LHPP	0.177182	1.33618
2021-09-07	0.1777	1.56425
RSSA	0.183067	2.22972
EF1A1	0.184379	1.4816
RAB14	0.184809	1.39018
HNRPF	0.187562	1.58418
STRN	0.187794	1.31911
AK1A1	0.194687	1.54629
U2AF4	0.200342	1.57555
ACSF2	0.206946	1.54277
PAK3	0.208422	1.68582
PARK7	0.211831	1.672
PRS7	0.217552	3.02949
PRDX3	0.218886	1.42821
QCR1	0.225271	1.82841
NIT1	0.227587	1.45861
TKT	0.228478	2.51059
2021-09-03	0.232453	1.32643
TRIO	0.232903	1.57333
NONO	0.235859	1.30563
GAMT	0.239283	1.63097
NUCL	0.239774	3.59567
GARS	0.240152	1.89354
RL3	0.243459	2.04775
LRFN4	0.243852	1.4465
CATA	0.243927	1.86133
TBB2A	0.244019	1.66775
STK39	0.247708	1.51724
TBB3	0.250838	2.52792
HNRPK	0.252564	1.78557
UBL4A	0.25562	1.58723
HSP72	0.258136	1.46093
PTBP2	0.272495	1.55295
RAB1A	0.273183	1.73569
ACTG	0.275381	4.79538
PP1R7	0.278571	1.54905
CBPE	0.278638	1.37559
NC2A	0.282092	1.45658
ECHB	0.285632	1.52281
RS11	0.28802	1.92171
SRR	0.288057	2.00214
ADPRH	0.289475	2.65805
COR1B	0.290586	2.21198
ACAD9	0.29141	2.1658
DC1I1	0.294865	5.67743
SMCE1	0.30256	1.34088
TOLIP	0.30305	1.34659
PTPRF	0.31747	2.06621
APT	0.322	1.97958
PIMT	0.325498	2.62828
RL8	0.326518	1.55154
RS6	0.328938	2.60772
DCX	0.331083	3.42331
MDHM	0.333951	1.47182
FYN	0.338768	4.17828
NLGN3	0.342475	1.56836
HNRPD	0.343708	2.40711
RM17	0.344172	1.32979
FIS1	0.34646	2.34775
SET	0.346654	1.31646
LGUL	0.348456	1.33331
ERP29	0.34939	4.03453
SV2B	0.349435	1.39837
PSPC1	0.350518	1.7631
LRC57	0.351594	1.83281
GDN	0.352162	1.44766
NLTP	0.353179	1.30585
RM16	0.355227	3.39462
PCCA	0.358007	1.6575
FKB1A	0.361281	1.57378
MRCKB	0.36956	2.09312
STMN2	0.377564	1.74038
SPTC2	0.381812	1.48981
AFAP1	0.386568	2.33897
NOVA1	0.387047	1.36753
KALRN	0.38743	1.61891
H10	0.391394	1.45053
AUP1	0.396857	1.71097
A4	0.398019	1.45288
CBPD	0.404488	2.52673
CPT1A	0.409556	3.33341
H14	0.411577	2.23398
NIT2	0.413721	2.76323
PHB2	0.414755	1.60195
COX5B	0.41494	1.75
GPX1	0.418451	1.69671
RS18	0.420435	2.11461
DCAKD	0.420444	2.16239
PRDX5	0.421544	2.02163
RT31	0.423545	1.45541
RHEB	0.42616	1.39034
AF1Q	0.431271	1.72539
RM37	0.43347	2.45715
SRP54	0.436669	2.18268
DIAP1	0.443791	1.34271
SNX5	0.455681	1.49311
ACSL6	0.468385	1.71304
TRIM9	0.469053	1.87477
RS28	0.471825	1.35154
ARHGB	0.47254	1.49962
SHAN2	0.473507	2.22433
RU1C	0.480096	1.63869
PRAF3	0.484787	1.9117
TAGL3	0.485399	1.79481
P5CR2	0.48964	1.81503
RL38	0.493006	1.34678
DCUP	0.498009	1.68626
DPY30	0.501917	1.49395
UBP4	0.502538	1.6344
KPCB	0.509851	2.45478
[truncated: 374 more rows]

## Sheet: 6D
	GFP								β-CTF
GluR1	1	1	1	1	1	1	1	1	0.302186	0.604243	0.956816	0.698565	0.933349	1.10893	0.704923	0.821603
GluR2	1	1	1	1	1	1	1	1	0.548233	0.485728	0.251134	0.518397	2.29635	0.749308	0.595816	1.52564
Synapsin-1	1	1	1	1	1	1	1	1	0.910333	0.42329	0.810425	0.584999	0.819459	0.652157	0.672632	1.091

## Sheet: 6F
	GFP						β-CTF
GluN2A	1.2818	1.93593	1.17084	0.759417	1.09088	0.715175	0.543611	0.364851	0.550889	0.698349	0.575878	1.17562
GluN2B	1.96439	2.29564	1.08929	0.911072	1.32978	1.29955	0.613555	0.379617	0.690467	0.762317	0.720072	1.67023

## Sheet: 6G
	GFP						β-CTF
VAMP2	2.44665	2.86151	2.30616	1.10809	2.07158	2.49133	1.27521	0.586585	0.664719	1.39446	0.659765	2.88692
Syntaxin1A	1.6926	2.11528	1.72626	1.28698	1.6927	1.76258	1.12718	0.54461	1.09742	1.29385	1.22309	3.27293

## Sheet: 6H
_MEMBER_MyList	_LogP_MyList	GO	_PATTERN_	_RANK_	GiniIndex	Category	CategoryID	Description	PARENT_GO	LogP	Enrichment	Z-score	#TotalGeneInLibrary	#GeneInGO	#GeneInHitList	#GeneInGOAndHitList	%InGO	STDV %InGO	GeneID	Hits	Log(q-value)	EvidenceCutoff	GROUP_ID	FirstInGroupByEnrichment	FirstInGroupByLogP	BestLogPInGroup	BestEnrichmentInGroup
1	-3.29813	GO:0050808	M1	1	0	GO Biological Processes	19	synapse organization	19_GO:0009987 cellular process	-3.29813	3.12639	4.2294	18033	336	206	12	5.82524	1.63189	29167|58948|64310|83721|113970|116839|170673|171114|171447|291709|306439|363058	Dctn1|Dlg3|Arf1|Dvl1|Magi2|Rims2|Palm|Ndrg2|Adgrl2|Slc25a46|Gpm6a|Cadm1	-0.683919	0	13	1	1	-3.29813	16.4135
1	-3.81199	GO:0099504	M1	1	0	GO Biological Processes	19	synaptic vesicle cycle	19_GO:0051179 localization	-3.81199	5.2262	5.27843	18033	134	206	8	3.8835	1.3461	24803|24804|24805|116470|116638|116657|116839|266767	Vamp2|Syp|Syt2|Stx1a|Slc17a7|Cplx2|Rims2|Slc17a8	-1.04189	0	2	0	0	-5.73836	18.7583
1	-4.34856	GO:0006091	M1	1	0	GO Biological Processes	19	generation of precursor metabolites and energy	19_GO:0008152 metabolic process	-4.34856	3.5523	5.14539	18033	345	206	14	6.79612	1.75353	24533|25059|25309|26201|29507|54322|58977|64001|292804|298596|299201|362809|499529|690987	Ldha|Hk2|Cycs|ND4|Cox7a2|Cox6c|Ppp1r1a|Cyb5a|Gpi|Sdhb|Dlst|Ptges3|Ndufs4|Gys1	-1.38309	0	7	1	1	-4.34856	12.5055
1	-5.73836	GO:0017157	M1	1	0	GO Biological Processes	19	regulation of exocytosis	19_GO:0051179 localization	-5.73836	4.71363	6.48368	18033	260	206	14	6.79612	1.75353	24242|24681|24803|24804|24805|64310|65171|83721|116470|116839|171058|171337|287645|301737	Calm1|Prkcg|Vamp2|Syp|Syt2|Arf1|Scamp5|Dvl1|Stx1a|Rims2|Rab3c|Rap1b|Snf8|Fer	-2.1052	0	2	1	1	-5.73836	18.7583
1	-7.76503	GO:0051668	M1	1	0	GO Biological Processes	19	localization within membrane	19_GO:0051179 localization	-7.76503	3.84786	7.26397	18033	546	206	24	11.6505	2.23532	24242|24803|24832|25272|29528|58948|60627|65201|66013|80843|83721|113970|116470|116654|170673|171058|252892|287645|288700|294708|296279|300111|306197|310669	Calm1|Vamp2|Thy1|Mapk10|Vamp3|Dlg3|Exoc5|Clip1|Arhgef9|Sec61a1|Dvl1|Magi2|Stx1a|Exoc4|Palm|Rab3c|Lgi1|Snf8|Rab35|Sgtb|Tm9sf4|Samm50|Tm9sf2|Golph3l	-3.673	0	1	1	1	-7.76503	18.7583
GiniIndex	Category	CategoryID	Description	PARENT_GO	LogP	Enrichment	Z-score	#TotalGeneInLibrary	#GeneInGO	#GeneInHitList	#GeneInGOAndHitList	%InGO	STDV %InGO	GeneID	Hits	Log(q-value)	EvidenceCutoff	GROUP_ID	FirstInGroupByEnrichment	FirstInGroupByLogP	BestLogPInGroup	BestEnrichmentInGroup
0	GO Cellular Components	20	mitochondrial envelope	5.01675	-5.01675	2.8616	5.29096	18033	673	206	22	10.6796	2.15189	24242|25059|25309|26201|26295|29507|29743|54322|64201|64304|65156|81805|140932|140937|171087|291709|298596|300111|304971|360463|360721|499529	Calm1|Hk2|Cycs|ND4|Ogt|Cox7a2|Slc25a1|Cox6c|Slc25a11|Acads|Dhodh|Suox|Bnip1|Higd1a|Mpc1|Slc25a46|Sdhb|Samm50|Tomm40l|Mpv17|Fam162a|Ndufs4	-3.04871	0	5	1	1	-5.01675	6.18961
0	GO Cellular Components	20	glutamatergic synapse	5.07577	-5.07577	3.2047	5.47843	18033	519	206	19	9.2233	2.01603	25272|29177|29598|29681|50592|58948|64310|83721|113970|116470|116657|116839|170851|171114|171447|252892|286930|306439|363058	Mapk10|Hpca|Atp2b1|C1qbp|Gria1|Dlg3|Arf1|Dvl1|Magi2|Stx1a|Cplx2|Rims2|Map2k1|Ndrg2|Adgrl2|Lgi1|Dlgap4|Gpm6a|Cadm1	-3.08654	0	2	0	0	-7.71637	4.27515
0	GO Cellular Components	20	postsynapse	7.57168	-7.57168	3.21752	6.84706	18033	789	206	29	14.0777	2.42318	24681|24804|25272|25595|29177|29284|29598|50592|54321|58948|64310|66013|81763|83721|83825|113970|116470|116590|116638|116654|116657|140674|170673|170851|171447|286930|289820|306439|363058	Prkcg|Syp|Mapk10|Map2|Hpca|Rps14|Atp2b1|Gria1|Cnn3|Dlg3|Arf1|Arhgef9|Rpl5|Dvl1|Dclk1|Magi2|Stx1a|Mapk1|Slc17a7|Exoc4|Cplx2|Gabrg1|Palm|Map2k1|Adgrl2|Dlgap4|Actr2|Gpm6a|Cadm1	-5.3606	0	2	0	0	-7.71637	4.27515
0	GO Cellular Components	20	presynapse	8.95746	-8.95746	3.71144	7.77155	18033	684	206	29	14.0777	2.42318	24242|24681|24778|24803|24804|24805|29528|29598|29681|29757|50592|65171|79130|83579|83721|85248|116470|116638|116654|116657|116839|171058|266767|287061|288700|299971|306439|360882|363058	Calm1|Prkcg|Slc2a1|Vamp2|Syp|Syt2|Vamp3|Atp2b1|C1qbp|Atp6v0a1|Gria1|Scamp5|Dnajc5|Gnb5|Dvl1|Kif3c|Stx1a|Slc17a7|Exoc4|Cplx2|Rims2|Rab3c|Slc17a8|Rogdi|Rab35|Atp6v1c1|Gpm6a|Cadm3|Cadm1	-6.59767	0	1	0	0	-12.2447	18.6253
0	GO Cellular Components	20	intrinsic component of synaptic vesicle membrane	12.2447	-12.2447	16.9851	14.0911	18033	67	206	13	6.31068	1.69414	24803|24804|24805|29528|29598|29757|65171|79130|116470|116638|171058|266767|288700	Vamp2|Syp|Syt2|Vamp3|Atp2b1|Atp6v0a1|Scamp5|Dnajc5|Stx1a|Slc17a7|Rab3c|Slc17a8|Rab35	-8.95439	0	1	1	1	-12.2447	18.6253
_MEMBER_MyList	_LogP_MyList	GO	_PATTERN_	_RANK_	GiniIndex	Category	CategoryID	Description	PARENT_GO	LogP	Enrichment	Z-score	#TotalGeneInLibrary	#GeneInGO	#GeneInHitList	#GeneInGOAndHitList	%InGO	STDV %InGO	GeneID	Hits	Log(q-value)	EvidenceCutoff	GROUP_ID	FirstInGroupByEnrichment	FirstInGroupByLogP	BestLogPInGroup	BestEnrichmentInGroup
1	-2.0742	GO:0035254	M1	1	0	GO Molecular Functions	21	glutamate receptor binding	2.0742	-2.0742	5.00222	3.60642	18033	70	206	4	1.94175	0.961402	24242|50592|58948|116654	Calm1|Gria1|Dlg3|Exoc4	0	0	13	0	0	-2.53719	5.00222
1	-2.28252	GO:0098918	M1	1	0	GO Molecular Functions	21	structural constituent of synapse	2.28252	-2.28252	8.4715	4.47553	18033	31	206	3	1.45631	0.834657	58948|113970|116839	Dlg3|Magi2|Rims2	-0.103123	0	11	0	0	-2.6036	10.9424
1	-3.83297	GO:0017075	M1	1	0	GO Molecular Functions	21	syntaxin-1 binding	3.83297	-3.83297	14.5898	7.16128	18033	24	206	4	1.94175	0.961402	24803|24804|29528|116657	Vamp2|Syp|Vamp3|Cplx2	-0.752339	0	4	1	1	-3.83297	14.5898
1	-4.29247	GO:0009055	M1	1	0	GO Molecular Functions	21	electron transfer activity	4.29247	-4.29247	9.05574	6.60544	18033	58	206	6	2.91262	1.17163	25309|26201|54322|64001|298596|499529	Cycs|ND4|Cox6c|Cyb5a|Sdhb|Ndufs4	-1.0869	0	3	1	1	-4.29247	9.05574
1	-5.22787	GO:0016491	M1	1	0	GO Molecular Functions	21	oxidoreductase activity	5.22787	-5.22787	2.78269	5.37922	18033	755	206	24	11.6505	2.23532	24426|24533|25309|26201|29507|54322|64001|64191|64304|64475|65156|81805|84013|84114|116484|116598|117520|140910|171562|298596|299194|304805|309262|499529	Gstp1|Ldha|Cycs|ND4|Cox7a2|Cox6c|Cyb5a|Dhcr7|Acads|P4ha1|Dhodh|Suox|Hsd17b12|Agps|Txn1|Pdia4|Oxr1|Msmo1|Ero1a|Sdhb|Ptgr2|Cyb5r1|Nsdhl|Ndufs4	-1.54519	0	1	1	1	-5.22787	2.78269

## Sheet: 6I
_MEMBER_MyList	_LogP_MyList	GO	_PATTERN_	_RANK_	GiniIndex	Category	CategoryID	Description	PARENT_GO	LogP	Enrichment	Z-score	#TotalGeneInLibrary	#GeneInGO	#GeneInHitList	#GeneInGOAndHitList	%InGO	STDV %InGO	GeneID	Hits
1	-3.15047	R-RNO-112314	M1	1	0	Reactome Gene Sets	6	Neurotransmitter receptors and postsynaptic signal transmission	3.15047	-3.15047	4.75017	4.59502	18033	129	206	7	3.39806	1.26234	24242|24681|50592|58948|66013|83579|553106	Calm1|Prkcg|Gria1|Dlg3|Arhgef9|Gnb5|Ncald
1	-3.52353	R-RNO-451306	M1	1	0	Reactome Gene Sets	6	Ionotropic activity of kainate receptors	3.52353	-3.52353	21.8847	7.7794	18033	12	206	3	1.45631	0.834657	24242|58948|553106	Calm1|Dlg3|Ncald
1	-4.81681	R-RNO-8953897	M1	1	0	Reactome Gene Sets	6	Cellular responses to stimuli	4.81681	-4.81681	3.33668	5.3714	18033	446	206	17	8.25243	1.91714	24426|25272|25309|29167|29425|85252|116456|116484|116590|171562|286899|287984|293103|299971|316531|362809|100912032	Gstp1|Mapk10|Cycs|Dctn1|Psmb5|Xpo1|Dnajc2|Txn1|Mapk1|Ero1a|Hsbp1|Psmd2|Hikeshi|Atp6v1c1|Tuba4a|Ptges3|Rps27a
1	-4.96027	R-RNO-112315	M1	1	0	Reactome Gene Sets	6	Transmission across Chemical Synapses	4.96027	-4.96027	5.12195	6.10717	18033	188	206	11	5.33981	1.56644	24242|24681|24803|50592|58948|66013|79130|83579|116470|116638|553106	Calm1|Prkcg|Vamp2|Gria1|Dlg3|Arhgef9|Dnajc5|Gnb5|Stx1a|Slc17a7|Ncald
1	-5.49052	R-RNO-194315	M1	1	0	Reactome Gene Sets	6	Signaling by Rho GTPases	5.49052	-5.49052	3.29093	5.76572	18033	532	206	20	9.70874	2.06286	24242|25437|29528|29681|60431|64159|64160|64678|65201|66013|81818|83721|85252|116590|116666|289820|300111|316226|316531|361940	Calm1|Emd|Vamp3|C1qbp|Vapb|Sptan1|Basp1|Tfrc|Clip1|Arhgef9|Vim|Dvl1|Xpo1|Mapk1|Lman1|Actr2|Samm50|Klc4|Tuba4a|Pgrmc2
1	-5.85422	R-RNO-9609507	M1	1	0	Reactome Gene Sets	6	Protein localization	5.85422	-5.85422	8.29315	7.66137	18033	95	206	9	4.36893	1.42414	24803|25437|29533|58857|64001|84114|116470|360463|100912032	Vamp2|Emd|Pxmp2|Vapa|Cyb5a|Agps|Stx1a|Mpv17|Rps27a
1	-5.88721	R-RNO-5653656	M1	1	0	Reactome Gene Sets	6	Vesicle-mediated transport	5.88721	-5.88721	3.49456	6.08715	18033	501	206	20	9.70874	2.06286	24803|24805|25407|29167|29528|50592|64159|64310|64678|79117|85248|116666|140932|287645|288700|289820|316226|316531|362502|100912032	Vamp2|Syt2|Cd59|Dctn1|Vamp3|Gria1|Sptan1|Arf1|Tfrc|Arf5|Kif3c|Lman1|Bnip1|Snf8|Rab35|Actr2|Klc4|Tuba4a|Ubap1|Rps27a
1	-6.17537	R-RNO-199991	M1	1	0	Reactome Gene Sets	6	Membrane Trafficking	6.17537	-6.17537	3.64745	6.3196	18033	480	206	20	9.70874	2.06286	24803|24805|25407|29167|29528|50592|64159|64310|64678|79117|85248|116666|140932|287645|288700|289820|316226|316531|362502|100912032	Vamp2|Syt2|Cd59|Dctn1|Vamp3|Gria1|Sptan1|Arf1|Tfrc|Arf5|Kif3c|Lman1|Bnip1|Snf8|Rab35|Actr2|Klc4|Tuba4a|Ubap1|Rps27a

## Sheet: 6K 
β-CTF	β-CTF+Rab5S34N
0.4978	0.27545
0.412735	0.215925
0.259393	0.215175
0.394846	0.244075
0.276077	0.155625
	0.192125
	0.289675
	0.264775
	0.19075

## Sheet: 6M
β-CTF	β-CTF+Rab5S34N
0.219167	0.646989
0.387158	0.379547
0.198374	0.336726
0.304314	0.60059
0.385731	0.348596
0.293301	0.633399
0.293712	0.583201
0.32771	0.608253
0.195814	0.603404
0.396398	0.3092
0.243597	0.630663
0.324983
0.201543
0.225006
0.36802
0.354858
0.298813
